# Supplementary material for: Twisting of the zebrafish heart tube during cardiac looping is a tbx5-dependent and tissue-intrinsic process
Source: eLife. 2021 Aug 10;10:e61733. doi: 10.7554/eLife.61733 (PMC8354640; doi:10.7554/eLife.61733)
Supplement: Figure 1—source data 1. [file elife-61733-fig1-data1.xlsx]

## Sheet: Figure 1G
		wt	oug	hst	oug x hst
	no phenotype	94	100	79	215
	heart + fins	0	34	23	83
	total	94	134	102	298

## Sheet: Figure 1J
		empty	WT	oug	hst
	replicate 1	2.76	30.79	2.19	9.08
	replicate 2	3.05	29.85	1.76	10.8
	replicate 3	4.22	33.57	2.28	11.09
	replicate 4	3.27	31.72	2.68	10.05
	replicate 5	3.63	33.93	3.24	10.02
	replicate 6	4.62	37.12	2.69	7.48
	mean	3.59167	32.83	2.47333	9.75333
	SEM	0.291106	1.07138	0.208481	0.537362
