# Supplementary material for: Twisting of the zebrafish heart tube during cardiac looping is a tbx5-dependent and tissue-intrinsic process
Source: eLife. 2021 Aug 10;10:e61733. doi: 10.7554/eLife.61733 (PMC8354640; doi:10.7554/eLife.61733)
Supplement: Figure 2—figure supplement 2—source data 1. [file elife-61733-fig2-figsupp2-data1.xlsx]

## Sheet: Figure 2-figure supplement 2
Left Panel	Column1	Column2	Column3	Column4	Column5		Right Panel	Column1	Column2	Column3	Column4	Column5	Column6	Column7	Column8	Column9	Column10
		genotype	replicate	Cat	total_rotation				index	ec	replicate	Cat	time_intervals	angular velocity	group	catrep	timerep
	61	wt	wt1	AVC	0			7	8	wt	wt1	AVC	0.0	-4.12927	wtAVC	wt1 AVC	0.0 AVC
	62	wt	wt1	AVC	2.12744			8	9	wt	wt1	AVC	1.5	-6.86735	wtAVC	wt1 AVC	1.5 AVC
	63	wt	wt1	AVC	-1.26589			9	10	wt	wt1	AVC	3.0	-3.55473	wtAVC	wt1 AVC	3.0 AVC
	64	wt	wt1	AVC	-1.06341			10	11	wt	wt1	AVC	4.5	2.5858	wtAVC	wt1 AVC	4.5 AVC
	65	wt	wt1	AVC	-0.740753			11	12	wt	wt1	AVC	6.0	-1.44033	wtAVC	wt1 AVC	6.0 AVC
	66	wt	wt1	AVC	-1.88834			12	13	wt	wt1	AVC	7.5	0.692891	wtAVC	wt1 AVC	7.5 AVC
	67	wt	wt1	AVC	-5.17613			13	14	wt	wt1	AVC	9.0	-0.592932	wtAVC	wt1 AVC	9.0 AVC
	68	wt	wt1	AVC	-2.0028			28	32	wt	wt2	AVC	0.0	-3.67187	wtAVC	wt2 AVC	0.0 AVC
	69	wt	wt1	AVC	-3.68196			29	33	wt	wt2	AVC	1.5	5.56493	wtAVC	wt2 AVC	1.5 AVC
	70	wt	wt1	AVC	-5.84667			30	34	wt	wt2	AVC	3.0	-4.32783	wtAVC	wt2 AVC	3.0 AVC
	71	wt	wt1	AVC	-7.08359			31	35	wt	wt2	AVC	4.5	-5.54626	wtAVC	wt2 AVC	4.5 AVC
	72	wt	wt1	AVC	-9.43963			32	36	wt	wt2	AVC	6.0	-0.980801	wtAVC	wt2 AVC	6.0 AVC
	73	wt	wt1	AVC	-10.6587			33	37	wt	wt2	AVC	7.5	-10.1618	wtAVC	wt2 AVC	7.5 AVC
	74	wt	wt1	AVC	-11.9604			34	38	wt	wt2	AVC	9.0	-7.63722	wtAVC	wt2 AVC	9.0 AVC
	75	wt	wt1	AVC	-13.0947			49	56	wt	wt3	AVC	0.0	-8.62836	wtAVC	wt3 AVC	0.0 AVC
	76	wt	wt1	AVC	-13.1958			50	57	wt	wt3	AVC	1.5	14.2285	wtAVC	wt3 AVC	1.5 AVC
	77	wt	wt1	AVC	-13.631			51	58	wt	wt3	AVC	3.0	4.64544	wtAVC	wt3 AVC	3.0 AVC
	78	wt	wt1	AVC	-15.6252			52	59	wt	wt3	AVC	4.5	5.54909	wtAVC	wt3 AVC	4.5 AVC
	79	wt	wt1	AVC	-16.4396			53	60	wt	wt3	AVC	6.0	2.16843	wtAVC	wt3 AVC	6.0 AVC
	80	wt	wt1	AVC	-17.493			54	61	wt	wt3	AVC	7.5	9.99329	wtAVC	wt3 AVC	7.5 AVC
	81	wt	wt1	AVC	-18.1843			55	62	wt	wt3	AVC	9.0	15.6936	wtAVC	wt3 AVC	9.0 AVC
	82	wt	wt1	AVC	-19.5418			70	80	wt	wt4	AVC	0.0	-2.29743	wtAVC	wt4 AVC	0.0 AVC
	83	wt	wt1	AVC	-22.1327			71	81	wt	wt4	AVC	1.5	-2.83588	wtAVC	wt4 AVC	1.5 AVC
	84	wt	wt1	AVC	-21.0319			72	82	wt	wt4	AVC	3.0	-0.501415	wtAVC	wt4 AVC	3.0 AVC
	85	wt	wt1	AVC	-21.3197			73	83	wt	wt4	AVC	4.5	0.855798	wtAVC	wt4 AVC	4.5 AVC
	86	wt	wt1	AVC	-21.24			74	84	wt	wt4	AVC	6.0	-4.80934	wtAVC	wt4 AVC	6.0 AVC
	87	wt	wt1	AVC	-20.58			75	85	wt	wt4	AVC	7.5	-6.51026	wtAVC	wt4 AVC	7.5 AVC
	88	wt	wt1	AVC	-18.8777			76	86	wt	wt4	AVC	9.0	-6.3388	wtAVC	wt4 AVC	9.0 AVC
	89	wt	wt1	AVC	-19.8655			91	104	wt	wt5	AVC	0.0	1.54753	wtAVC	wt5 AVC	0.0 AVC
	90	wt	wt1	AVC	-19.4952			92	105	wt	wt5	AVC	1.5	1.14217	wtAVC	wt5 AVC	1.5 AVC
	91	wt	wt1	AVC	-17.8341			93	106	wt	wt5	AVC	3.0	1.28246	wtAVC	wt5 AVC	3.0 AVC
	92	wt	wt1	AVC	-18.022			94	107	wt	wt5	AVC	4.5	-4.68372	wtAVC	wt5 AVC	4.5 AVC
	93	wt	wt1	AVC	-20.6552			95	108	wt	wt5	AVC	6.0	-1.42439	wtAVC	wt5 AVC	6.0 AVC
	94	wt	wt1	AVC	-18.1376			96	109	wt	wt5	AVC	7.5	-1.91013	wtAVC	wt5 AVC	7.5 AVC
	95	wt	wt1	AVC	-14.8174			97	110	wt	wt5	AVC	9.0	-0.101843	wtAVC	wt5 AVC	9.0 AVC
	96	wt	wt1	AVC	-16.1698
	97	wt	wt1	AVC	-13.6038
	98	wt	wt1	AVC	-13.6421
	99	wt	wt1	AVC	-12.3729
	100	wt	wt1	AVC	-12.9168
	101	wt	wt1	AVC	-13.895
	102	wt	wt1	AVC	-14.0792
	103	wt	wt1	AVC	-13.3946
	104	wt	wt1	AVC	-14.7864
	105	wt	wt1	AVC	-15.5466
	106	wt	wt1	AVC	-14.8297
	107	wt	wt1	AVC	-16.5385
	108	wt	wt1	AVC	-16.3109
	109	wt	wt1	AVC	-17.7015
	110	wt	wt1	AVC	-17.6565
	111	wt	wt1	AVC	-16.8304
	112	wt	wt1	AVC	-17.5465
	113	wt	wt1	AVC	-16.1404
	114	wt	wt1	AVC	-12.9953
	115	wt	wt1	AVC	-10.9258
	116	wt	wt1	AVC	-9.2636
	117	wt	wt1	AVC	-10.146
	118	wt	wt1	AVC	-10.8534
	119	wt	wt1	AVC	-9.46359
	120	wt	wt1	AVC	-11.6071
	121	wt	wt1	AVC	-10.5137
	238	wt	wt2	AVC	0
	239	wt	wt2	AVC	-3.56456
	240	wt	wt2	AVC	-3.41272
	241	wt	wt2	AVC	-4.5486
	242	wt	wt2	AVC	-6.37521
	243	wt	wt2	AVC	-5.84953
	244	wt	wt2	AVC	-5.75927
	245	wt	wt2	AVC	-8.11676
	246	wt	wt2	AVC	-9.57082
	247	wt	wt2	AVC	-7.21518
	248	wt	wt2	AVC	-8.24142
	249	wt	wt2	AVC	-4.03302
	250	wt	wt2	AVC	-5.88634
	251	wt	wt2	AVC	-2.96692
	252	wt	wt2	AVC	-3.08751
	253	wt	wt2	AVC	-1.75131
	254	wt	wt2	AVC	-2.79816
	255	wt	wt2	AVC	-0.823599
	256	wt	wt2	AVC	-3.11037
	257	wt	wt2	AVC	-5.96669
	258	wt	wt2	AVC	-4.8344
	259	wt	wt2	AVC	-6.6111
	260	wt	wt2	AVC	-7.75621
	261	wt	wt2	AVC	-6.43396
	262	wt	wt2	AVC	-7.77361
	263	wt	wt2	AVC	-9.6246
	264	wt	wt2	AVC	-10.3876
	265	wt	wt2	AVC	-10.3442
	266	wt	wt2	AVC	-11.3241
	267	wt	wt2	AVC	-11.4488
	268	wt	wt2	AVC	-14.8054
	269	wt	wt2	AVC	-16.199
	270	wt	wt2	AVC	-14.301
	271	wt	wt2	AVC	-16.329
	272	wt	wt2	AVC	-14.4454
	273	wt	wt2	AVC	-14.6204
	274	wt	wt2	AVC	-17.6271
	275	wt	wt2	AVC	-15.3871
	276	wt	wt2	AVC	-15.845
	277	wt	wt2	AVC	-16.0631
	278	wt	wt2	AVC	-18.4789
	279	wt	wt2	AVC	-20.892
	280	wt	wt2	AVC	-22.9573
	281	wt	wt2	AVC	-27.7583
	282	wt	wt2	AVC	-29.9318
	283	wt	wt2	AVC	-31.4519
	284	wt	wt2	AVC	-28.0042
	285	wt	wt2	AVC	-32.7545
	286	wt	wt2	AVC	-35.6403
	287	wt	wt2	AVC	-38.2383
	288	wt	wt2	AVC	-40.3446
	289	wt	wt2	AVC	-40.0357
	290	wt	wt2	AVC	-42.1386
	291	wt	wt2	AVC	-43.1513
	292	wt	wt2	AVC	-45.3909
	405	wt	wt3	AVC	0
	406	wt	wt3	AVC	-1.76701
	407	wt	wt3	AVC	-8.1709
	408	wt	wt3	AVC	-15.8459
	409	wt	wt3	AVC	-5.64324
	410	wt	wt3	AVC	-11.4257
	411	wt	wt3	AVC	-7.47949
	412	wt	wt3	AVC	-8.07621
	413	wt	wt3	AVC	-9.23248
	414	wt	wt3	AVC	-3.54452
	415	wt	wt3	AVC	-7.80737
	416	wt	wt3	AVC	-1.80392
	417	wt	wt3	AVC	3.12262
	418	wt	wt3	AVC	2.29942
	419	wt	wt3	AVC	9.79521
	420	wt	wt3	AVC	6.65339
	421	wt	wt3	AVC	6.08991
	422	wt	wt3	AVC	8.98817
	423	wt	wt3	AVC	8.69208
	424	wt	wt3	AVC	9.28277
	425	wt	wt3	AVC	10.8527
	426	wt	wt3	AVC	11.8716
	427	wt	wt3	AVC	12.099
	428	wt	wt3	AVC	12.8813
	429	wt	wt3	AVC	12.1338
	430	wt	wt3	AVC	10.9658
	431	wt	wt3	AVC	11.7628
	432	wt	wt3	AVC	11.2743
	433	wt	wt3	AVC	11.2494
	434	wt	wt3	AVC	15.4145
	435	wt	wt3	AVC	15.5332
	436	wt	wt3	AVC	18.1328
	437	wt	wt3	AVC	19.3278
	438	wt	wt3	AVC	14.3071
	439	wt	wt3	AVC	12.9043
	440	wt	wt3	AVC	15.9335
	441	wt	wt3	AVC	17.8804
	442	wt	wt3	AVC	20.8429
	443	wt	wt3	AVC	17.3009
	444	wt	wt3	AVC	14.0327
	445	wt	wt3	AVC	15.891
	446	wt	wt3	AVC	15.7938
	447	wt	wt3	AVC	19.7571
	448	wt	wt3	AVC	19.5584
	449	wt	wt3	AVC	15.7978
	450	wt	wt3	AVC	19.3002
	451	wt	wt3	AVC	15.6014
	452	wt	wt3	AVC	20.0006
	453	wt	wt3	AVC	18.3906
	454	wt	wt3	AVC	19.1088
	455	wt	wt3	AVC	21.718
	456	wt	wt3	AVC	27.8597
	457	wt	wt3	AVC	30.8823
	458	wt	wt3	AVC	24.6213
	459	wt	wt3	AVC	22.7016
	460	wt	wt3	AVC	30.0285
	461	wt	wt3	AVC	30.6731
	583	wt	wt4	AVC	0
	584	wt	wt4	AVC	-2.98117
	585	wt	wt4	AVC	0.834388
	586	wt	wt4	AVC	-1.57194
	587	wt	wt4	AVC	-4.68012
	588	wt	wt4	AVC	-5.22662
	589	wt	wt4	AVC	-3.97178
	590	wt	wt4	AVC	-2.99535
	591	wt	wt4	AVC	-4.42288
	592	wt	wt4	AVC	-4.2471
	593	wt	wt4	AVC	-4.245
	594	wt	wt4	AVC	-3.22563
	595	wt	wt4	AVC	-3.95005
	596	wt	wt4	AVC	-5.74636
	597	wt	wt4	AVC	-4.53089
	598	wt	wt4	AVC	-8.28463
	599	wt	wt4	AVC	-5.61289
	600	wt	wt4	AVC	-6.76306
	601	wt	wt4	AVC	-7.21555
	602	wt	wt4	AVC	-7.67791
	603	wt	wt4	AVC	-8.86141
	604	wt	wt4	AVC	-6.25078
	605	wt	wt4	AVC	-8.23733
	606	wt	wt4	AVC	-9.13352
	607	wt	wt4	AVC	-8.93911
	608	wt	wt4	AVC	-8.12688
	609	wt	wt4	AVC	-7.89629
	610	wt	wt4	AVC	-8.54178
	611	wt	wt4	AVC	-7.04808
	612	wt	wt4	AVC	-6.92105
	613	wt	wt4	AVC	-2.97746
	614	wt	wt4	AVC	-5.23082
	615	wt	wt4	AVC	-3.86625
	616	wt	wt4	AVC	-3.3845
	617	wt	wt4	AVC	-5.77615
	618	wt	wt4	AVC	-5.01923
	619	wt	wt4	AVC	-5.39721
	620	wt	wt4	AVC	-6.54647
	621	wt	wt4	AVC	-5.73967
	622	wt	wt4	AVC	-6.78353
	623	wt	wt4	AVC	-7.38125
	624	wt	wt4	AVC	-7.86424
	625	wt	wt4	AVC	-7.86644
	626	wt	wt4	AVC	-7.74215
	627	wt	wt4	AVC	-11.8038
	628	wt	wt4	AVC	-13.421
	629	wt	wt4	AVC	-14.8003
	630	wt	wt4	AVC	-14.7185
	631	wt	wt4	AVC	-15.4295
	632	wt	wt4	AVC	-17.7783
	633	wt	wt4	AVC	-19.5614
	634	wt	wt4	AVC	-21.065
	635	wt	wt4	AVC	-21.2521
	636	wt	wt4	AVC	-21.7036
	637	wt	wt4	AVC	-22.104
	638	wt	wt4	AVC	-21.7475
	639	wt	wt4	AVC	-22.6974
	640	wt	wt4	AVC	-21.9448
	641	wt	wt4	AVC	-23.8853
	642	wt	wt4	AVC	-24.5329
	643	wt	wt4	AVC	-25.8812
	644	wt	wt4	AVC	-26.5851
	645	wt	wt4	AVC	-29.568
	646	wt	wt4	AVC	-29.6223
	775	wt	wt5	AVC	0
	776	wt	wt5	AVC	1.17114
	777	wt	wt5	AVC	1.73254
	778	wt	wt5	AVC	-1.87483
	779	wt	wt5	AVC	-1.80444
	780	wt	wt5	AVC	-3.49811
	781	wt	wt5	AVC	0.23028
	782	wt	wt5	AVC	1.43872
	783	wt	wt5	AVC	1.35188
	784	wt	wt5	AVC	3.15945
	785	wt	wt5	AVC	2.32099
	786	wt	wt5	AVC	3.83427
	787	wt	wt5	AVC	4.61765
	788	wt	wt5	AVC	4.24509
	789	wt	wt5	AVC	3.55586
	790	wt	wt5	AVC	3.71575
	791	wt	wt5	AVC	5.00634
	792	wt	wt5	AVC	5.16419
	793	wt	wt5	AVC	4.11657
	794	wt	wt5	AVC	4.62324
	795	wt	wt5	AVC	4.71536
	796	wt	wt5	AVC	5.31404
	797	wt	wt5	AVC	5.14325
	798	wt	wt5	AVC	5.16433
	799	wt	wt5	AVC	5.03628
	800	wt	wt5	AVC	3.29129
	801	wt	wt5	AVC	7.36182
	802	wt	wt5	AVC	6.88221
	803	wt	wt5	AVC	6.30653
	804	wt	wt5	AVC	7.44525
	805	wt	wt5	AVC	5.82131
	806	wt	wt5	AVC	4.22691
	807	wt	wt5	AVC	3.90298
	808	wt	wt5	AVC	2.22221
	809	wt	wt5	AVC	2.9938
	810	wt	wt5	AVC	2.39676
	811	wt	wt5	AVC	0.300178
	812	wt	wt5	AVC	-0.590816
	813	wt	wt5	AVC	-2.37724
	814	wt	wt5	AVC	-2.78665
	815	wt	wt5	AVC	-1.57518
	816	wt	wt5	AVC	-0.607541
	817	wt	wt5	AVC	-1.47507
	818	wt	wt5	AVC	-2.47492
	819	wt	wt5	AVC	-2.75569
	820	wt	wt5	AVC	-4.04833
	821	wt	wt5	AVC	-2.69761
	822	wt	wt5	AVC	-3.41639
	823	wt	wt5	AVC	-4.49031
	824	wt	wt5	AVC	-3.65627
	825	wt	wt5	AVC	-3.66453
	826	wt	wt5	AVC	-4.8492
	827	wt	wt5	AVC	-4.81069
	828	wt	wt5	AVC	-5.11179
	829	wt	wt5	AVC	-5.74229
	830	wt	wt5	AVC	-5.51128
	831	wt	wt5	AVC	-4.55118
	832	wt	wt5	AVC	-5.0217
	833	wt	wt5	AVC	-5.00034
	834	wt	wt5	AVC	-6.19766
	835	wt	wt5	AVC	-6.6551
	836	wt	wt5	AVC	-5.86533
	837	wt	wt5	AVC	-4.61673
	838	wt	wt5	AVC	-4.88118
