# Supplementary material for: Twisting of the zebrafish heart tube during cardiac looping is a tbx5-dependent and tissue-intrinsic process
Source: eLife. 2021 Aug 10;10:e61733. doi: 10.7554/eLife.61733 (PMC8354640; doi:10.7554/eLife.61733)
Supplement: Figure 2—source data 1. [file elife-61733-fig2-data1.xlsx]

## Sheet: Figure 2J
Column1	Column2	Column3	Column4	Column5	Column6
	genotype	replicate	Chamaber	time_hr	total_rotation
0	wt	wt1	A	0	0
1	wt	wt1	A	0.166743	3.56626
2	wt	wt1	A	0.333485	2.91987
3	wt	wt1	A	0.500228	3.4349
4	wt	wt1	A	0.66697	3.93053
5	wt	wt1	A	0.833713	4.41373
6	wt	wt1	A	1.00046	-0.07791
7	wt	wt1	A	1.1672	7.138
8	wt	wt1	A	1.33394	9.64607
9	wt	wt1	A	1.50068	8.64011
10	wt	wt1	A	1.66743	9.77434
11	wt	wt1	A	1.83417	10.4734
12	wt	wt1	A	2.00091	9.22871
13	wt	wt1	A	2.16765	8.90723
14	wt	wt1	A	2.3344	8.11956
15	wt	wt1	A	2.50114	15.9012
16	wt	wt1	A	2.66788	17.2876
17	wt	wt1	A	2.83462	16.0978
18	wt	wt1	A	3.00137	15.8167
19	wt	wt1	A	3.16811	17.2382
20	wt	wt1	A	3.33485	19.1394
21	wt	wt1	A	3.50159	19.2039
22	wt	wt1	A	3.66834	18.9792
23	wt	wt1	A	3.83508	20.9287
24	wt	wt1	A	4.00182	21.0506
25	wt	wt1	A	4.16856	22.5686
26	wt	wt1	A	4.33531	25.4086
27	wt	wt1	A	4.50205	26.0245
28	wt	wt1	A	4.66879	27.4014
29	wt	wt1	A	4.83553	28.1246
30	wt	wt1	A	5.00228	31.6425
31	wt	wt1	A	5.16902	29.471
32	wt	wt1	A	5.33576	31.955
33	wt	wt1	A	5.5025	33.3784
34	wt	wt1	A	5.66925	36.3546
35	wt	wt1	A	5.83599	35.1699
36	wt	wt1	A	6.00273	38.1482
37	wt	wt1	A	6.16947	39.9891
38	wt	wt1	A	6.33622	43.2834
39	wt	wt1	A	6.50296	42.919
40	wt	wt1	A	6.6697	43.895
41	wt	wt1	A	6.83644	45.4426
42	wt	wt1	A	7.00319	45.4861
43	wt	wt1	A	7.16993	45.6034
44	wt	wt1	A	7.33667	46.7095
45	wt	wt1	A	7.50341	48.2504
46	wt	wt1	A	7.67016	46.6542
47	wt	wt1	A	7.8369	48.5865
48	wt	wt1	A	8.00364	50.4715
49	wt	wt1	A	8.17038	51.4217
50	wt	wt1	A	8.33713	52.2097
51	wt	wt1	A	8.50387	53.5999
52	wt	wt1	A	8.67061	55.0094
53	wt	wt1	A	8.83735	56.1153
54	wt	wt1	A	9.0041	59.4087
55	wt	wt1	A	9.17084	60.1272
56	wt	wt1	A	9.33758	60.8271
57	wt	wt1	A	9.50432	61.3699
58	wt	wt1	A	9.67107	62.8203
59	wt	wt1	A	9.83781	62.4569
60	wt	wt1	A	10.0046	64.6925
122	wt	wt1	V	0	0
123	wt	wt1	V	0.166743	6.38261
124	wt	wt1	V	0.333485	-5.21764
125	wt	wt1	V	0.500228	-0.503144
126	wt	wt1	V	0.66697	-3.69223
127	wt	wt1	V	0.833713	-11.1483
128	wt	wt1	V	1.00046	-18.5762
129	wt	wt1	V	1.1672	-11.376
130	wt	wt1	V	1.33394	-14.627
131	wt	wt1	V	1.50068	-20.4401
132	wt	wt1	V	1.66743	-19.0794
133	wt	wt1	V	1.83417	-22.8136
134	wt	wt1	V	2.00091	-26.8156
135	wt	wt1	V	2.16765	-30.85
136	wt	wt1	V	2.3344	-36.1813
137	wt	wt1	V	2.50114	-32.6913
138	wt	wt1	V	2.66788	-32.5122
139	wt	wt1	V	2.83462	-33.826
140	wt	wt1	V	3.00137	-36.7161
141	wt	wt1	V	3.16811	-36.3871
142	wt	wt1	V	3.33485	-37.1363
143	wt	wt1	V	3.50159	-38.4519
144	wt	wt1	V	3.66834	-42.2221
145	wt	wt1	V	3.83508	-39.8279
146	wt	wt1	V	4.00182	-41.2159
147	wt	wt1	V	4.16856	-41.5778
148	wt	wt1	V	4.33531	-42.1156
149	wt	wt1	V	4.50205	-42.0263
150	wt	wt1	V	4.66879	-41.6646
151	wt	wt1	V	4.83553	-43.6478
152	wt	wt1	V	5.00228	-43.193
153	wt	wt1	V	5.16902	-43.5373
154	wt	wt1	V	5.33576	-45.0988
155	wt	wt1	V	5.5025	-44.6453
156	wt	wt1	V	5.66925	-43.6374
157	wt	wt1	V	5.83599	-43.2857
158	wt	wt1	V	6.00273	-43.7168
159	wt	wt1	V	6.16947	-43.9766
160	wt	wt1	V	6.33622	-42.2023
161	wt	wt1	V	6.50296	-43.9208
162	wt	wt1	V	6.6697	-44.1468
163	wt	wt1	V	6.83644	-43.679
164	wt	wt1	V	7.00319	-43.8531
165	wt	wt1	V	7.16993	-46.0734
166	wt	wt1	V	7.33667	-47.981
167	wt	wt1	V	7.50341	-48.0239
168	wt	wt1	V	7.67016	-50.5082
169	wt	wt1	V	7.8369	-51.0867
170	wt	wt1	V	8.00364	-52.9174
171	wt	wt1	V	8.17038	-54.0234
172	wt	wt1	V	8.33713	-54.4727
173	wt	wt1	V	8.50387	-55.5835
174	wt	wt1	V	8.67061	-55.7662
175	wt	wt1	V	8.83735	-53.6
176	wt	wt1	V	9.0041	-50.5302
177	wt	wt1	V	9.17084	-50.1781
178	wt	wt1	V	9.33758	-50.6299
179	wt	wt1	V	9.50432	-50.5448
180	wt	wt1	V	9.67107	-49.2523
181	wt	wt1	V	9.83781	-51.2689
182	wt	wt1	V	10.0046	-50.8522
183	wt	wt2	A	0	0
184	wt	wt2	A	0.191131	-4.23839
185	wt	wt2	A	0.382263	-9.11764
186	wt	wt2	A	0.573394	-9.46937
187	wt	wt2	A	0.764526	-11.6725
188	wt	wt2	A	0.955657	-8.71714
189	wt	wt2	A	1.14679	-6.37299
190	wt	wt2	A	1.33792	-4.66881
191	wt	wt2	A	1.52905	-3.60913
192	wt	wt2	A	1.72018	-3.39128
193	wt	wt2	A	1.91131	-3.2043
194	wt	wt2	A	2.10245	-2.64627
195	wt	wt2	A	2.29358	-4.33866
196	wt	wt2	A	2.48471	-0.762709
197	wt	wt2	A	2.67584	0.0633111
198	wt	wt2	A	2.86697	0.782863
199	wt	wt2	A	3.0581	0.172817
200	wt	wt2	A	3.24923	2.98754
201	wt	wt2	A	3.44036	4.74142
202	wt	wt2	A	3.6315	5.24503
203	wt	wt2	A	3.82263	4.7764
204	wt	wt2	A	4.01376	5.27995
205	wt	wt2	A	4.20489	6.28899
206	wt	wt2	A	4.39602	5.99908
207	wt	wt2	A	4.58715	6.7231
208	wt	wt2	A	4.77828	8.20519
209	wt	wt2	A	4.96942	8.07997
210	wt	wt2	A	5.16055	8.24858
211	wt	wt2	A	5.35168	8.43707
212	wt	wt2	A	5.54281	8.3375
213	wt	wt2	A	5.73394	6.51625
214	wt	wt2	A	5.92507	7.32668
215	wt	wt2	A	6.1162	6.16686
216	wt	wt2	A	6.30734	6.99256
217	wt	wt2	A	6.49847	6.86427
218	wt	wt2	A	6.6896	7.35961
219	wt	wt2	A	6.88073	7.54183
220	wt	wt2	A	7.07186	4.26585
221	wt	wt2	A	7.26299	5.61387
222	wt	wt2	A	7.45412	7.31165
223	wt	wt2	A	7.64526	7.89459
224	wt	wt2	A	7.83639	7.72808
225	wt	wt2	A	8.02752	6.48435
226	wt	wt2	A	8.21865	5.58762
227	wt	wt2	A	8.40978	6.41259
228	wt	wt2	A	8.60091	7.56889
229	wt	wt2	A	8.79204	5.3594
230	wt	wt2	A	8.98318	3.79342
231	wt	wt2	A	9.17431	5.98721
232	wt	wt2	A	9.36544	3.53216
233	wt	wt2	A	9.55657	3.2836
234	wt	wt2	A	9.7477	3.64411
235	wt	wt2	A	9.93883	4.10635
236	wt	wt2	A	10.13	1.52429
237	wt	wt2	A	10.3211	0.76671
293	wt	wt2	V	0	0
294	wt	wt2	V	0.191131	-6.74799
295	wt	wt2	V	0.382263	-3.36656
296	wt	wt2	V	0.573394	0.181313
297	wt	wt2	V	0.764526	-4.67706
298	wt	wt2	V	0.955657	-1.31639
299	wt	wt2	V	1.14679	-1.75143
300	wt	wt2	V	1.33792	-4.17309
301	wt	wt2	V	1.52905	-4.38545
302	wt	wt2	V	1.72018	-4.37381
303	wt	wt2	V	1.91131	-6.83214
304	wt	wt2	V	2.10245	-7.88791
305	wt	wt2	V	2.29358	-12.0861
306	wt	wt2	V	2.48471	-10.9887
307	wt	wt2	V	2.67584	-2.82267
308	wt	wt2	V	2.86697	1.3885
309	wt	wt2	V	3.0581	1.78191
310	wt	wt2	V	3.24923	4.1509
311	wt	wt2	V	3.44036	1.15
312	wt	wt2	V	3.6315	-1.57515
313	wt	wt2	V	3.82263	-3.83734
314	wt	wt2	V	4.01376	-5.58558
315	wt	wt2	V	4.20489	-2.81149
316	wt	wt2	V	4.39602	-4.6677
317	wt	wt2	V	4.58715	-7.81444
318	wt	wt2	V	4.77828	-9.92052
319	wt	wt2	V	4.96942	-11.9485
320	wt	wt2	V	5.16055	-12.4551
321	wt	wt2	V	5.35168	-10.8084
322	wt	wt2	V	5.54281	-13.0257
323	wt	wt2	V	5.73394	-16.6139
324	wt	wt2	V	5.92507	-15.5023
325	wt	wt2	V	6.1162	-17.6118
326	wt	wt2	V	6.30734	-15.741
327	wt	wt2	V	6.49847	-18.1016
328	wt	wt2	V	6.6896	-18.0844
329	wt	wt2	V	6.88073	-14.0074
330	wt	wt2	V	7.07186	-17.9921
331	wt	wt2	V	7.26299	-18.6764
332	wt	wt2	V	7.45412	-21.3904
333	wt	wt2	V	7.64526	-21.3637
334	wt	wt2	V	7.83639	-21.5025
335	wt	wt2	V	8.02752	-26.1874
336	wt	wt2	V	8.21865	-25.6706
337	wt	wt2	V	8.40978	-24.2798
338	wt	wt2	V	8.60091	-26.2784
339	wt	wt2	V	8.79204	-27.8426
340	wt	wt2	V	8.98318	-29.383
341	wt	wt2	V	9.17431	-27.5572
342	wt	wt2	V	9.36544	-29.8059
343	wt	wt2	V	9.55657	-34.3352
344	wt	wt2	V	9.7477	-37.2492
345	wt	wt2	V	9.93883	-32.6798
346	wt	wt2	V	10.13	-35.7485
347	wt	wt2	V	10.3211	-37.5302
348	wt	wt3	A	0.487118	0
349	wt	wt3	A	0.64949	-1.02896
350	wt	wt3	A	0.811863	-2.17594
351	wt	wt3	A	0.974235	3.33874
352	wt	wt3	A	1.13661	2.76972
353	wt	wt3	A	1.29898	2.47811
354	wt	wt3	A	1.46135	3.94542
355	wt	wt3	A	1.62373	7.22997
356	wt	wt3	A	1.7861	6.94832
357	wt	wt3	A	1.94847	8.34008
358	wt	wt3	A	2.11084	10.9836
359	wt	wt3	A	2.27322	11.2784
360	wt	wt3	A	2.43559	14.0625
361	wt	wt3	A	2.59796	13.4042
362	wt	wt3	A	2.76033	15.2888
363	wt	wt3	A	2.92271	15.6691
364	wt	wt3	A	3.08508	17.5043
365	wt	wt3	A	3.24745	19.6189
366	wt	wt3	A	3.40982	20.1369
367	wt	wt3	A	3.5722	19.4375
368	wt	wt3	A	3.73457	21.4413
369	wt	wt3	A	3.89694	22.8322
370	wt	wt3	A	4.05931	23.8643
371	wt	wt3	A	4.22169	25.2888
372	wt	wt3	A	4.38406	26.5861
373	wt	wt3	A	4.54643	27.2509
374	wt	wt3	A	4.7088	27.8095
375	wt	wt3	A	4.87118	27.9292
376	wt	wt3	A	5.03355	27.8037
377	wt	wt3	A	5.19592	28.1477
378	wt	wt3	A	5.35829	29.2145
379	wt	wt3	A	5.52067	31.1586
380	wt	wt3	A	5.68304	31.034
381	wt	wt3	A	5.84541	29.3967
382	wt	wt3	A	6.00778	28.4568
383	wt	wt3	A	6.17016	29.5705
384	wt	wt3	A	6.33253	34.8404
385	wt	wt3	A	6.4949	36.2632
386	wt	wt3	A	6.65727	35.2443
387	wt	wt3	A	6.81965	33.2467
388	wt	wt3	A	6.98202	35.5269
389	wt	wt3	A	7.14439	38.2677
390	wt	wt3	A	7.30676	36.354
391	wt	wt3	A	7.46914	37.5433
392	wt	wt3	A	7.63151	35.7127
393	wt	wt3	A	7.79388	35.0245
394	wt	wt3	A	7.95625	35.1363
395	wt	wt3	A	8.11863	32.5738
396	wt	wt3	A	8.281	34.0125
397	wt	wt3	A	8.44337	33.3067
398	wt	wt3	A	8.60574	33.6455
399	wt	wt3	A	8.76812	37.5345
400	wt	wt3	A	8.93049	36.945
401	wt	wt3	A	9.09286	35.5163
402	wt	wt3	A	9.25523	36.2094
403	wt	wt3	A	9.41761	39.5255
404	wt	wt3	A	9.57998	40.962
462	wt	wt3	V	0.487118	0
463	wt	wt3	V	0.64949	-3.12753
464	wt	wt3	V	0.811863	-7.97915
465	wt	wt3	V	0.974235	-10.0259
466	wt	wt3	V	1.13661	-11.8144
467	wt	wt3	V	1.29898	-14.0165
468	wt	wt3	V	1.46135	-15.9851
469	wt	wt3	V	1.62373	-15.1569
470	wt	wt3	V	1.7861	-14.9749
471	wt	wt3	V	1.94847	-15.0776
472	wt	wt3	V	2.11084	-15.6265
473	wt	wt3	V	2.27322	-15.5507
474	wt	wt3	V	2.43559	-17.0477
475	wt	wt3	V	2.59796	-17.8173
476	wt	wt3	V	2.76033	-17.1663
477	wt	wt3	V	2.92271	-19.2125
478	wt	wt3	V	3.08508	-17.6921
479	wt	wt3	V	3.24745	-18.0088
480	wt	wt3	V	3.40982	-18.0258
481	wt	wt3	V	3.5722	-18.1022
482	wt	wt3	V	3.73457	-18.9425
483	wt	wt3	V	3.89694	-17.7366
484	wt	wt3	V	4.05931	-21.6126
485	wt	wt3	V	4.22169	-19.2436
486	wt	wt3	V	4.38406	-19.3893
487	wt	wt3	V	4.54643	-23.1586
488	wt	wt3	V	4.7088	-24.4109
489	wt	wt3	V	4.87118	-24.4921
490	wt	wt3	V	5.03355	-19.097
491	wt	wt3	V	5.19592	-18.9618
492	wt	wt3	V	5.35829	-20.75
493	wt	wt3	V	5.52067	-20.9658
494	wt	wt3	V	5.68304	-21.086
495	wt	wt3	V	5.84541	-19.6266
496	wt	wt3	V	6.00778	-20.0739
497	wt	wt3	V	6.17016	-20.2686
498	wt	wt3	V	6.33253	-42.0359
499	wt	wt3	V	6.4949	-39.8402
500	wt	wt3	V	6.65727	-40.2251
501	wt	wt3	V	6.81965	-41.6092
502	wt	wt3	V	6.98202	-38.2177
503	wt	wt3	V	7.14439	-44.3286
504	wt	wt3	V	7.30676	-53.5244
505	wt	wt3	V	7.46914	-49.4781
506	wt	wt3	V	7.63151	-50.0446
507	wt	wt3	V	7.79388	-46.1739
508	wt	wt3	V	7.95625	-44.2185
509	wt	wt3	V	8.11863	-45.7463
510	wt	wt3	V	8.281	-53.1623
511	wt	wt3	V	8.44337	-46.5477
512	wt	wt3	V	8.60574	-42.0041
513	wt	wt3	V	8.76812	-26.9179
514	wt	wt3	V	8.93049	-36.754
515	wt	wt3	V	9.09286	-41.9529
516	wt	wt3	V	9.25523	-44.4103
517	wt	wt3	V	9.41761	-53.3816
518	wt	wt3	V	9.57998	-53.1337
519	wt	wt4	A	0	0
520	wt	wt4	A	0.166665	3.00671
521	wt	wt4	A	0.333329	3.97362
522	wt	wt4	A	0.499994	1.93112
523	wt	wt4	A	0.666659	-0.425558
524	wt	wt4	A	0.833324	-0.493201
525	wt	wt4	A	0.999988	0.918331
526	wt	wt4	A	1.16665	1.13003
527	wt	wt4	A	1.33332	0.882115
528	wt	wt4	A	1.49998	2.57272
529	wt	wt4	A	1.66665	3.50715
530	wt	wt4	A	1.83331	3.57306
531	wt	wt4	A	1.99998	4.44062
532	wt	wt4	A	2.16664	2.68717
533	wt	wt4	A	2.33331	2.92326
534	wt	wt4	A	2.49997	1.02779
535	wt	wt4	A	2.66664	2.09288
536	wt	wt4	A	2.8333	1.57776
537	wt	wt4	A	2.99996	2.82234
538	wt	wt4	A	3.16663	3.42446
539	wt	wt4	A	3.33329	4.40985
540	wt	wt4	A	3.49996	6.89487
541	wt	wt4	A	3.66662	4.06203
542	wt	wt4	A	3.83329	3.29608
543	wt	wt4	A	3.99995	2.60822
544	wt	wt4	A	4.16662	4.65259
545	wt	wt4	A	4.33328	3.84167
546	wt	wt4	A	4.49995	3.48673
547	wt	wt4	A	4.66661	5.03769
548	wt	wt4	A	4.83328	4.45087
549	wt	wt4	A	4.99994	6.43483
550	wt	wt4	A	5.16661	6.72252
551	wt	wt4	A	5.33327	7.29273
552	wt	wt4	A	5.49994	8.34192
553	wt	wt4	A	5.6666	7.30344
554	wt	wt4	A	5.83327	9.00763
555	wt	wt4	A	5.99993	9.62419
556	wt	wt4	A	6.16659	10.1237
557	wt	wt4	A	6.33326	11.6944
558	wt	wt4	A	6.49992	13.5866
559	wt	wt4	A	6.66659	14.3211
560	wt	wt4	A	6.83325	14.8267
561	wt	wt4	A	6.99992	14.983
562	wt	wt4	A	7.16658	16.5788
563	wt	wt4	A	7.33325	16.2072
564	wt	wt4	A	7.49991	16.3466
565	wt	wt4	A	7.66658	16.9034
566	wt	wt4	A	7.83324	18.4351
567	wt	wt4	A	7.99991	18.2933
568	wt	wt4	A	8.16657	18.3868
569	wt	wt4	A	8.33324	17.6804
570	wt	wt4	A	8.4999	17.293
571	wt	wt4	A	8.66657	17.9268
572	wt	wt4	A	8.83323	19.4272
573	wt	wt4	A	8.99989	21.0436
574	wt	wt4	A	9.16656	21.3605
575	wt	wt4	A	9.33322	22.5198
576	wt	wt4	A	9.49989	23.0592
577	wt	wt4	A	9.66655	22.8857
578	wt	wt4	A	9.83322	23.014
579	wt	wt4	A	9.99988	23.3637
580	wt	wt4	A	10.1665	22.1436
581	wt	wt4	A	10.3332	22.286
582	wt	wt4	A	10.4999	22.0336
647	wt	wt4	V	0	0
648	wt	wt4	V	0.166665	2.61513
649	wt	wt4	V	0.333329	4.09128
650	wt	wt4	V	0.499994	0.51411
651	wt	wt4	V	0.666659	6.3379
652	wt	wt4	V	0.833324	5.40071
653	wt	wt4	V	0.999988	-0.648389
654	wt	wt4	V	1.16665	-2.04177
655	wt	wt4	V	1.33332	-2.04342
656	wt	wt4	V	1.49998	-2.07217
657	wt	wt4	V	1.66665	1.8845
658	wt	wt4	V	1.83331	0.218679
659	wt	wt4	V	1.99998	-0.807072
660	wt	wt4	V	2.16664	-4.08576
661	wt	wt4	V	2.33331	-3.14173
662	wt	wt4	V	2.49997	-6.93575
663	wt	wt4	V	2.66664	-5.79642
664	wt	wt4	V	2.8333	-6.53279
665	wt	wt4	V	2.99996	-9.57906
666	wt	wt4	V	3.16663	-8.52516
667	wt	wt4	V	3.33329	-11.2693
668	wt	wt4	V	3.49996	-9.29949
669	wt	wt4	V	3.66662	-9.54146
670	wt	wt4	V	3.83329	-11.5919
671	wt	wt4	V	3.99995	-14.495
672	wt	wt4	V	4.16662	-14.8533
673	wt	wt4	V	4.33328	-16.8757
674	wt	wt4	V	4.49995	-18.2154
675	wt	wt4	V	4.66661	-17.989
676	wt	wt4	V	4.83328	-19.3309
677	wt	wt4	V	4.99994	-13.7898
678	wt	wt4	V	5.16661	-9.91773
679	wt	wt4	V	5.33327	-10.7909
680	wt	wt4	V	5.49994	-7.14083
681	wt	wt4	V	5.6666	-13.5215
682	wt	wt4	V	5.83327	-12.9185
683	wt	wt4	V	5.99993	-15.7594
684	wt	wt4	V	6.16659	-16.4945
685	wt	wt4	V	6.33326	-20.4461
686	wt	wt4	V	6.49992	-19.616
687	wt	wt4	V	6.66659	-20.6624
688	wt	wt4	V	6.83325	-21.944
689	wt	wt4	V	6.99992	-22.995
690	wt	wt4	V	7.16658	-21.0371
691	wt	wt4	V	7.33325	-27.2925
692	wt	wt4	V	7.49991	-27.7857
693	wt	wt4	V	7.66658	-28.6635
694	wt	wt4	V	7.83324	-28.8645
695	wt	wt4	V	7.99991	-30.6415
696	wt	wt4	V	8.16657	-32.5005
697	wt	wt4	V	8.33324	-36.2101
698	wt	wt4	V	8.4999	-38.2867
699	wt	wt4	V	8.66657	-39.1879
700	wt	wt4	V	8.83323	-40.3659
701	wt	wt4	V	8.99989	-41.9561
702	wt	wt4	V	9.16656	-43.8984
703	wt	wt4	V	9.33322	-45.927
704	wt	wt4	V	9.49989	-44.24
705	wt	wt4	V	9.66655	-48.2605
706	wt	wt4	V	9.83322	-48.8548
707	wt	wt4	V	9.99988	-49.173
708	wt	wt4	V	10.1665	-49.8326
709	wt	wt4	V	10.3332	-54.672
710	wt	wt4	V	10.4999	-53.2421
711	wt	wt5	A	0	0
712	wt	wt5	A	0.166643	0.535435
713	wt	wt5	A	0.333286	1.5193
714	wt	wt5	A	0.499929	1.39514
715	wt	wt5	A	0.666572	-0.910303
716	wt	wt5	A	0.833215	-2.39147
717	wt	wt5	A	0.999858	-0.00118668
718	wt	wt5	A	1.1665	0.259336
719	wt	wt5	A	1.33314	1.32663
720	wt	wt5	A	1.49979	3.56461
721	wt	wt5	A	1.66643	3.83152
722	wt	wt5	A	1.83307	6.86999
723	wt	wt5	A	1.99972	7.78646
724	wt	wt5	A	2.16636	7.9599
725	wt	wt5	A	2.333	8.44536
726	wt	wt5	A	2.49965	8.63657
727	wt	wt5	A	2.66629	9.72107
728	wt	wt5	A	2.83293	9.85004
729	wt	wt5	A	2.99957	8.41688
730	wt	wt5	A	3.16622	8.90453
731	wt	wt5	A	3.33286	10.4243
732	wt	wt5	A	3.4995	12.2723
733	wt	wt5	A	3.66615	12.3973
734	wt	wt5	A	3.83279	13.7911
735	wt	wt5	A	3.99943	14.699
736	wt	wt5	A	4.16608	14.5902
737	wt	wt5	A	4.33272	16.7284
738	wt	wt5	A	4.49936	18.9347
739	wt	wt5	A	4.66601	18.7234
740	wt	wt5	A	4.83265	20.3434
741	wt	wt5	A	4.99929	22.4541
742	wt	wt5	A	5.16593	22.1138
743	wt	wt5	A	5.33258	23.6917
744	wt	wt5	A	5.49922	23.1382
745	wt	wt5	A	5.66586	24.4701
746	wt	wt5	A	5.83251	24.268
747	wt	wt5	A	5.99915	23.8721
748	wt	wt5	A	6.16579	23.0815
749	wt	wt5	A	6.33244	24.3527
750	wt	wt5	A	6.49908	25.044
751	wt	wt5	A	6.66572	25.8533
752	wt	wt5	A	6.83237	26.9635
753	wt	wt5	A	6.99901	27.2541
754	wt	wt5	A	7.16565	27.3826
755	wt	wt5	A	7.33229	26.5373
756	wt	wt5	A	7.49894	26.3334
757	wt	wt5	A	7.66558	27.6499
758	wt	wt5	A	7.83222	27.7557
759	wt	wt5	A	7.99887	28.4665
760	wt	wt5	A	8.16551	29.8431
761	wt	wt5	A	8.33215	30.6364
762	wt	wt5	A	8.4988	30.9116
763	wt	wt5	A	8.66544	31.8282
764	wt	wt5	A	8.83208	32.1626
765	wt	wt5	A	8.99872	32.5566
766	wt	wt5	A	9.16537	33.1449
767	wt	wt5	A	9.33201	34.862
768	wt	wt5	A	9.49865	35.0691
769	wt	wt5	A	9.6653	35.9809
770	wt	wt5	A	9.83194	35.5638
771	wt	wt5	A	9.99858	34.7887
772	wt	wt5	A	10.1652	37.6115
773	wt	wt5	A	10.3319	38.5693
774	wt	wt5	A	10.4985	38.2334
839	wt	wt5	V	0	0
840	wt	wt5	V	0.166643	1.19317
841	wt	wt5	V	0.333286	3.24949
842	wt	wt5	V	0.499929	-0.606512
843	wt	wt5	V	0.666572	2.83148
844	wt	wt5	V	0.833215	1.49921
845	wt	wt5	V	0.999858	6.05516
846	wt	wt5	V	1.1665	3.03487
847	wt	wt5	V	1.33314	2.96869
848	wt	wt5	V	1.49979	3.81156
849	wt	wt5	V	1.66643	3.0877
850	wt	wt5	V	1.83307	1.92427
851	wt	wt5	V	1.99972	2.0523
852	wt	wt5	V	2.16636	1.97126
853	wt	wt5	V	2.333	1.9882
854	wt	wt5	V	2.49965	2.78772
855	wt	wt5	V	2.66629	-0.0601928
856	wt	wt5	V	2.83293	1.07465
857	wt	wt5	V	2.99957	1.6427
858	wt	wt5	V	3.16622	1.52211
859	wt	wt5	V	3.33286	0.56261
860	wt	wt5	V	3.4995	-0.470135
861	wt	wt5	V	3.66615	-1.28749
862	wt	wt5	V	3.83279	-0.692207
863	wt	wt5	V	3.99943	-0.691204
864	wt	wt5	V	4.16608	-2.07221
865	wt	wt5	V	4.33272	-4.03285
866	wt	wt5	V	4.49936	-1.69388
867	wt	wt5	V	4.66601	-5.25421
868	wt	wt5	V	4.83265	-6.45701
869	wt	wt5	V	4.99929	-5.3126
870	wt	wt5	V	5.16593	-7.99148
871	wt	wt5	V	5.33258	-7.29341
872	wt	wt5	V	5.49922	-9.97756
873	wt	wt5	V	5.66586	-8.99395
874	wt	wt5	V	5.83251	-8.79097
875	wt	wt5	V	5.99915	-10.5147
876	wt	wt5	V	6.16579	-11.2735
877	wt	wt5	V	6.33244	-12.6404
878	wt	wt5	V	6.49908	-12.9049
879	wt	wt5	V	6.66572	-12.981
880	wt	wt5	V	6.83237	-12.378
881	wt	wt5	V	6.99901	-13.5736
882	wt	wt5	V	7.16565	-15.4145
883	wt	wt5	V	7.33229	-16.0175
884	wt	wt5	V	7.49894	-18.336
885	wt	wt5	V	7.66558	-15.8714
886	wt	wt5	V	7.83222	-17.9732
887	wt	wt5	V	7.99887	-18.4778
888	wt	wt5	V	8.16551	-17.7344
889	wt	wt5	V	8.33215	-19.2614
890	wt	wt5	V	8.4988	-20.0481
891	wt	wt5	V	8.66544	-20.3125
892	wt	wt5	V	8.83208	-22.7746
893	wt	wt5	V	8.99872	-25.2682
894	wt	wt5	V	9.16537	-25.7222
895	wt	wt5	V	9.33201	-25.3968
896	wt	wt5	V	9.49865	-26.6498
897	wt	wt5	V	9.6653	-27.258
898	wt	wt5	V	9.83194	-29.0484
899	wt	wt5	V	9.99858	-29.9756
900	wt	wt5	V	10.1652	-28.8837
901	wt	wt5	V	10.3319	-28.3731
902	wt	wt5	V	10.4985	-29.8425

## Sheet: Figure 2K
Column1	Column2	Column3	Column4	Column5	Column6	Column7	Column8	Column9	Column10
	index	genotype	replicate	Chamber	time_intervals	angular velocity	group	catrep	timerep
0	0	wt	wt1	A	0.0	3.82641	wtA	wt1 A	0.0 A
1	1	wt	wt1	A	1.5	6.20887	wtA	wt1 A	1.5 A
2	2	wt	wt1	A	3.0	5.98785	wtA	wt1 A	3.0 A
3	3	wt	wt1	A	4.5	7.42273	wtA	wt1 A	4.5 A
4	4	wt	wt1	A	6.0	5.79908	wtA	wt1 A	6.0 A
5	5	wt	wt1	A	7.5	6.82591	wtA	wt1 A	7.5 A
6	6	wt	wt1	A	9.0	4.82007	wtA	wt1 A	9.0 A
14	16	wt	wt1	V	0.0	-17.1018	wtV	wt1 V	0.0 V
15	17	wt	wt1	V	1.5	-12.2907	wtV	wt1 V	1.5 V
16	18	wt	wt1	V	3.0	-4.66841	wtV	wt1 V	3.0 V
17	19	wt	wt1	V	4.5	-1.48501	wtV	wt1 V	4.5 V
18	20	wt	wt1	V	6.0	-2.63945	wtV	wt1 V	6.0 V
19	21	wt	wt1	V	7.5	-4.86051	wtV	wt1 V	7.5 V
20	22	wt	wt1	V	9.0	-0.379121	wtV	wt1 V	9.0 V
21	24	wt	wt2	A	0.0	0.924991	wtA	wt2 A	0.0 A
22	25	wt	wt2	A	1.5	3.34159	wtA	wt2 A	1.5 A
23	26	wt	wt2	A	3.0	3.63986	wtA	wt2 A	3.0 A
24	27	wt	wt2	A	4.5	-0.202964	wtA	wt2 A	4.5 A
25	28	wt	wt2	A	6.0	-0.404418	wtA	wt2 A	6.0 A
26	29	wt	wt2	A	7.5	-2.27175	wtA	wt2 A	7.5 A
27	30	wt	wt2	A	9.0	-3.5231	wtA	wt2 A	9.0 A
35	40	wt	wt2	V	0.0	1.76716	wtV	wt2 V	0.0 V
36	41	wt	wt2	V	1.5	1.96235	wtV	wt2 V	1.5 V
37	42	wt	wt2	V	3.0	-6.37981	wtV	wt2 V	3.0 V
38	43	wt	wt2	V	4.5	-5.53513	wtV	wt2 V	4.5 V
39	44	wt	wt2	V	6.0	-2.28728	wtV	wt2 V	6.0 V
40	45	wt	wt2	V	7.5	-5.40127	wtV	wt2 V	7.5 V
41	46	wt	wt2	V	9.0	-7.50206	wtV	wt2 V	9.0 V
42	48	wt	wt3	A	0.0	5.23401	wtA	wt3 A	0.0 A
43	49	wt	wt3	A	1.5	7.38888	wtA	wt3 A	1.5 A
44	50	wt	wt3	A	3.0	6.58838	wtA	wt3 A	3.0 A
45	51	wt	wt3	A	4.5	2.6817	wtA	wt3 A	4.5 A
46	52	wt	wt3	A	6.0	5.3074	wtA	wt3 A	6.0 A
47	53	wt	wt3	A	7.5	1.04806	wtA	wt3 A	7.5 A
48	54	wt	wt3	A	9.0	12.1038	wtA	wt3 A	9.0 A
56	64	wt	wt3	V	0.0	-16.1816	wtV	wt3 V	0.0 V
57	65	wt	wt3	V	1.5	-3.0482	wtV	wt3 V	1.5 V
58	66	wt	wt3	V	3.0	-1.77587	wtV	wt3 V	3.0 V
59	67	wt	wt3	V	4.5	3.02825	wtV	wt3 V	4.5 V
60	68	wt	wt3	V	6.0	-18.8645	wtV	wt3 V	6.0 V
61	69	wt	wt3	V	7.5	11.7588	wtV	wt3 V	7.5 V
62	70	wt	wt3	V	9.0	-26.1828	wtV	wt3 V	9.0 V
63	72	wt	wt4	A	0.0	-1.12689	wtA	wt4 A	0.0 A
64	73	wt	wt4	A	1.5	-1.50802	wtA	wt4 A	1.5 A
65	74	wt	wt4	A	3.0	-0.739391	wtA	wt4 A	3.0 A
66	75	wt	wt4	A	4.5	3.53733	wtA	wt4 A	4.5 A
67	76	wt	wt4	A	6.0	4.50768	wtA	wt4 A	6.0 A
68	77	wt	wt4	A	7.5	1.77108	wtA	wt4 A	7.5 A
69	78	wt	wt4	A	9.0	0.0637645	wtA	wt4 A	9.0 A
77	88	wt	wt4	V	0.0	-4.92519	wtV	wt4 V	0.0 V
78	89	wt	wt4	V	1.5	-7.89383	wtV	wt4 V	1.5 V
79	90	wt	wt4	V	3.0	-7.16422	wtV	wt4 V	3.0 V
80	91	wt	wt4	V	4.5	3.14695	wtV	wt4 V	4.5 V
81	92	wt	wt4	V	6.0	-7.08794	wtV	wt4 V	6.0 V
82	93	wt	wt4	V	7.5	-11.0555	wtV	wt4 V	7.5 V
83	94	wt	wt4	V	9.0	-7.57083	wtV	wt4 V	9.0 V
84	96	wt	wt5	A	0.0	1.01776	wtA	wt5 A	0.0 A
85	97	wt	wt5	A	1.5	3.1832	wtA	wt5 A	1.5 A
86	98	wt	wt5	A	3.0	6.598	wtA	wt5 A	3.0 A
87	99	wt	wt5	A	4.5	3.74304	wtA	wt5 A	4.5 A
88	100	wt	wt5	A	6.0	2.56429	wtA	wt5 A	6.0 A
89	101	wt	wt5	A	7.5	4.06448	wtA	wt5 A	7.5 A
90	102	wt	wt5	A	9.0	3.53736	wtA	wt5 A	9.0 A
98	112	wt	wt5	V	0.0	2.01405	wtV	wt5 V	0.0 V
99	113	wt	wt5	V	1.5	-1.1739	wtV	wt5 V	1.5 V
100	114	wt	wt5	V	3.0	-2.92623	wtV	wt5 V	3.0 V
101	115	wt	wt5	V	4.5	-3.73981	wtV	wt5 V	4.5 V
102	116	wt	wt5	V	6.0	-4.39991	wtV	wt5 V	6.0 V
103	117	wt	wt5	V	7.5	-5.79825	wtV	wt5 V	7.5 V
104	118	wt	wt5	V	9.0	-3.26	wtV	wt5 V	9.0 V
