# Supplementary material for: Twisting of the zebrafish heart tube during cardiac looping is a tbx5-dependent and tissue-intrinsic process
Source: eLife. 2021 Aug 10;10:e61733. doi: 10.7554/eLife.61733 (PMC8354640; doi:10.7554/eLife.61733)
Supplement: Figure 4—figure supplement 1—source data 1. [file elife-61733-fig4-figsupp1-data1.xlsx]

## Sheet: Figure 4-figure supplement 1
Left Panel	Column1	Column2	Column3	Column4	Column5		Right Panel	Column1	Column2	Column3	Column4	Column5	Column6	Column7	Column8	Column9	Column10
		genotype	replicate	Cat	total_rotation				index	genotype	replicate	Cat	time_intervals	angular velocity	group	catrep	timerep
	55	oug	oug1	AVC	0			112	8	oug	oug1	AVC	0.0	0.350676	ougAVC	oug1 AVC	0.0 AVC
	56	oug	oug1	AVC	0.127718			113	9	oug	oug1	AVC	1.5	-9.73577	ougAVC	oug1 AVC	1.5 AVC
	57	oug	oug1	AVC	0.354749			114	10	oug	oug1	AVC	3.0	2.07471	ougAVC	oug1 AVC	3.0 AVC
	58	oug	oug1	AVC	-0.0724458			115	11	oug	oug1	AVC	4.5	-7.46107	ougAVC	oug1 AVC	4.5 AVC
	59	oug	oug1	AVC	5.63891			116	12	oug	oug1	AVC	6.0	-8.30156	ougAVC	oug1 AVC	6.0 AVC
	60	oug	oug1	AVC	0.864773			117	13	oug	oug1	AVC	7.5	1.81173	ougAVC	oug1 AVC	7.5 AVC
	61	oug	oug1	AVC	0.159231			118	14	oug	oug1	AVC	9.0	2.69364	ougAVC	oug1 AVC	9.0 AVC
	62	oug	oug1	AVC	0.571219			133	32	oug	oug2	AVC	0.0	2.63229	ougAVC	oug2 AVC	0.0 AVC
	63	oug	oug1	AVC	2.48931			134	33	oug	oug2	AVC	1.5	9.06161	ougAVC	oug2 AVC	1.5 AVC
	64	oug	oug1	AVC	4.01595			135	34	oug	oug2	AVC	3.0	-6.00543	ougAVC	oug2 AVC	3.0 AVC
	65	oug	oug1	AVC	-0.0248741			136	35	oug	oug2	AVC	4.5	-1.72119	ougAVC	oug2 AVC	4.5 AVC
	66	oug	oug1	AVC	-0.885441			137	36	oug	oug2	AVC	6.0	0.466942	ougAVC	oug2 AVC	6.0 AVC
	67	oug	oug1	AVC	-4.08158			138	37	oug	oug2	AVC	7.5	-4.34937	ougAVC	oug2 AVC	7.5 AVC
	68	oug	oug1	AVC	-7.88973			139	38	oug	oug2	AVC	9.0	-2.91328	ougAVC	oug2 AVC	9.0 AVC
	69	oug	oug1	AVC	-7.72373			154	56	oug	oug3	AVC	0.0	5.57511	ougAVC	oug3 AVC	0.0 AVC
	70	oug	oug1	AVC	-7.62746			155	57	oug	oug3	AVC	1.5	13.6804	ougAVC	oug3 AVC	1.5 AVC
	71	oug	oug1	AVC	-5.37489			156	58	oug	oug3	AVC	3.0	4.54326	ougAVC	oug3 AVC	3.0 AVC
	72	oug	oug1	AVC	-3.53697			157	59	oug	oug3	AVC	4.5	1.78614	ougAVC	oug3 AVC	4.5 AVC
	73	oug	oug1	AVC	-4.72255			158	60	oug	oug3	AVC	6.0	-3.44822	ougAVC	oug3 AVC	6.0 AVC
	74	oug	oug1	AVC	-4.81943			159	61	oug	oug3	AVC	7.5	-3.79413	ougAVC	oug3 AVC	7.5 AVC
	75	oug	oug1	AVC	-4.62278			160	62	oug	oug3	AVC	9.0	-1.29311	ougAVC	oug3 AVC	9.0 AVC
	76	oug	oug1	AVC	-4.06241			175	80	oug	oug4	AVC	0.0	-39.1257	ougAVC	oug4 AVC	0.0 AVC
	77	oug	oug1	AVC	-2.89765			176	81	oug	oug4	AVC	1.5	3.9697	ougAVC	oug4 AVC	1.5 AVC
	78	oug	oug1	AVC	-1.3841			177	82	oug	oug4	AVC	3.0	-4.11106	ougAVC	oug4 AVC	3.0 AVC
	79	oug	oug1	AVC	-5.63282			178	83	oug	oug4	AVC	4.5	-1.63574	ougAVC	oug4 AVC	4.5 AVC
	80	oug	oug1	AVC	-5.74107			179	84	oug	oug4	AVC	6.0	1.11651	ougAVC	oug4 AVC	6.0 AVC
	81	oug	oug1	AVC	-7.12301			180	85	oug	oug4	AVC	7.5	-4.84415	ougAVC	oug4 AVC	7.5 AVC
	82	oug	oug1	AVC	-9.8525			181	86	oug	oug4	AVC	9.0	2.4206	ougAVC	oug4 AVC	9.0 AVC
	83	oug	oug1	AVC	-9.08264			196	104	oug	oug5	AVC	0.0	4.79443	ougAVC	oug5 AVC	0.0 AVC
	84	oug	oug1	AVC	-11.5686			197	105	oug	oug5	AVC	1.5	-1.89641	ougAVC	oug5 AVC	1.5 AVC
	85	oug	oug1	AVC	-12.7875			198	106	oug	oug5	AVC	3.0	-0.20374	ougAVC	oug5 AVC	3.0 AVC
	86	oug	oug1	AVC	-15.9167			199	107	oug	oug5	AVC	4.5	2.21094	ougAVC	oug5 AVC	4.5 AVC
	87	oug	oug1	AVC	-16.9242			200	108	oug	oug5	AVC	6.0	0.376429	ougAVC	oug5 AVC	6.0 AVC
	88	oug	oug1	AVC	-18.3188			201	109	oug	oug5	AVC	7.5	-1.88989	ougAVC	oug5 AVC	7.5 AVC
	89	oug	oug1	AVC	-19.8869			202	110	oug	oug5	AVC	9.0	1.00314	ougAVC	oug5 AVC	9.0 AVC
	90	oug	oug1	AVC	-20.4365
	91	oug	oug1	AVC	-21.6929
	92	oug	oug1	AVC	-25.1922
	93	oug	oug1	AVC	-26.0756
	94	oug	oug1	AVC	-27.9706
	95	oug	oug1	AVC	-27.5881
	96	oug	oug1	AVC	-25.3767
	97	oug	oug1	AVC	-27.3926
	98	oug	oug1	AVC	-29.0847
	99	oug	oug1	AVC	-26.5352
	100	oug	oug1	AVC	-25.8939
	101	oug	oug1	AVC	-25.925
	102	oug	oug1	AVC	-24.0476
	103	oug	oug1	AVC	-22.7112
	104	oug	oug1	AVC	-23.278
	105	oug	oug1	AVC	-23.1003
	106	oug	oug1	AVC	-22.9919
	107	oug	oug1	AVC	-22.5101
	108	oug	oug1	AVC	-21.2791
	109	oug	oug1	AVC	-19.4355
	211	oug	oug2	AVC	0
	212	oug	oug2	AVC	3.89845
	213	oug	oug2	AVC	6.6083
	214	oug	oug2	AVC	5.56349
	215	oug	oug2	AVC	7.02278
	216	oug	oug2	AVC	6.75161
	217	oug	oug2	AVC	7.79521
	218	oug	oug2	AVC	9.78498
	219	oug	oug2	AVC	10.0939
	220	oug	oug2	AVC	11.6486
	221	oug	oug2	AVC	14.9154
	222	oug	oug2	AVC	18.2552
	223	oug	oug2	AVC	18.9501
	224	oug	oug2	AVC	19.8789
	225	oug	oug2	AVC	19.7134
	226	oug	oug2	AVC	18.0552
	227	oug	oug2	AVC	16.5243
	228	oug	oug2	AVC	15.8565
	229	oug	oug2	AVC	10.292
	230	oug	oug2	AVC	13.8897
	231	oug	oug2	AVC	17.0776
	232	oug	oug2	AVC	15.5885
	233	oug	oug2	AVC	15.7574
	234	oug	oug2	AVC	17.943
	235	oug	oug2	AVC	15.2377
	236	oug	oug2	AVC	14.056
	237	oug	oug2	AVC	15.2261
	238	oug	oug2	AVC	17.2223
	239	oug	oug2	AVC	16.9467
	240	oug	oug2	AVC	18.8095
	241	oug	oug2	AVC	19.5798
	242	oug	oug2	AVC	18.6621
	243	oug	oug2	AVC	14.3996
	244	oug	oug2	AVC	16.6423
	245	oug	oug2	AVC	18.6881
	246	oug	oug2	AVC	17.7088
	247	oug	oug2	AVC	18.0523
	248	oug	oug2	AVC	14.5352
	249	oug	oug2	AVC	12.0023
	250	oug	oug2	AVC	10.594
	251	oug	oug2	AVC	3.71338
	252	oug	oug2	AVC	2.4692
	253	oug	oug2	AVC	3.94267
	254	oug	oug2	AVC	5.59771
	255	oug	oug2	AVC	3.11945
	256	oug	oug2	AVC	3.63922
	347	oug	oug3	AVC	0
	348	oug	oug3	AVC	-0.841415
	349	oug	oug3	AVC	3.33861
	350	oug	oug3	AVC	11.9773
	351	oug	oug3	AVC	1.55804
	352	oug	oug3	AVC	-3.73869
	353	oug	oug3	AVC	-0.0543371
	354	oug	oug3	AVC	5.99692
	355	oug	oug3	AVC	9.89484
	356	oug	oug3	AVC	10.2142
	357	oug	oug3	AVC	11.5361
	358	oug	oug3	AVC	11.7604
	359	oug	oug3	AVC	13.0863
	360	oug	oug3	AVC	17.6507
	361	oug	oug3	AVC	20.4777
	362	oug	oug3	AVC	18.4314
	363	oug	oug3	AVC	16.3412
	364	oug	oug3	AVC	19.1672
	365	oug	oug3	AVC	17.7278
	366	oug	oug3	AVC	15.397
	367	oug	oug3	AVC	18.0923
	368	oug	oug3	AVC	18.1507
	369	oug	oug3	AVC	19.1035
	370	oug	oug3	AVC	18.3927
	371	oug	oug3	AVC	15.4583
	372	oug	oug3	AVC	14.3942
	373	oug	oug3	AVC	13.4143
	374	oug	oug3	AVC	10.6698
	375	oug	oug3	AVC	12.7853
	376	oug	oug3	AVC	9.31556
	377	oug	oug3	AVC	11.5878
	378	oug	oug3	AVC	13.4998
	379	oug	oug3	AVC	11.6722
	380	oug	oug3	AVC	12.1035
	381	oug	oug3	AVC	9.4987
	382	oug	oug3	AVC	10.6634
	383	oug	oug3	AVC	8.46487
	384	oug	oug3	AVC	9.25569
	385	oug	oug3	AVC	12.2626
	386	oug	oug3	AVC	12.7003
	387	oug	oug3	AVC	9.07626
	388	oug	oug3	AVC	12.2079
	389	oug	oug3	AVC	6.75822
	390	oug	oug3	AVC	10.2896
	490	oug	oug4	AVC	0
	491	oug	oug4	AVC	-1.57738
	492	oug	oug4	AVC	-13.045
	493	oug	oug4	AVC	-6.30916
	494	oug	oug4	AVC	-12.3709
	495	oug	oug4	AVC	-5.81552
	496	oug	oug4	AVC	-4.12727
	497	oug	oug4	AVC	-3.67315
	498	oug	oug4	AVC	-5.51598
	499	oug	oug4	AVC	-3.29414
	500	oug	oug4	AVC	-3.62781
	501	oug	oug4	AVC	-3.85336
	502	oug	oug4	AVC	-3.22532
	503	oug	oug4	AVC	-6.71109
	504	oug	oug4	AVC	-4.1718
	505	oug	oug4	AVC	-6.16355
	506	oug	oug4	AVC	-7.681
	507	oug	oug4	AVC	-10.8342
	508	oug	oug4	AVC	-8.4258
	509	oug	oug4	AVC	-8.1748
	510	oug	oug4	AVC	-9.11299
	511	oug	oug4	AVC	-11.9009
	512	oug	oug4	AVC	-8.44421
	513	oug	oug4	AVC	-10.4091
	514	oug	oug4	AVC	-10.9876
	515	oug	oug4	AVC	-11.3579
	516	oug	oug4	AVC	-11.4127
	517	oug	oug4	AVC	-12.6209
	518	oug	oug4	AVC	-12.3805
	519	oug	oug4	AVC	-11.8268
	520	oug	oug4	AVC	-12.2686
	521	oug	oug4	AVC	-10.4894
	522	oug	oug4	AVC	-10.809
	523	oug	oug4	AVC	-9.36735
	524	oug	oug4	AVC	-9.79479
	525	oug	oug4	AVC	-8.95733
	526	oug	oug4	AVC	-9.29354
	527	oug	oug4	AVC	-9.37579
	528	oug	oug4	AVC	-11.1721
	529	oug	oug4	AVC	-11.7652
	530	oug	oug4	AVC	-10.5596
	531	oug	oug4	AVC	-12.7176
	532	oug	oug4	AVC	-11.754
	533	oug	oug4	AVC	-12.7866
	534	oug	oug4	AVC	-15.0545
	535	oug	oug4	AVC	-14.5832
	536	oug	oug4	AVC	-14.0561
	537	oug	oug4	AVC	-19.4981
	538	oug	oug4	AVC	-19.8098
	539	oug	oug4	AVC	-21.7838
	540	oug	oug4	AVC	-25.8761
	541	oug	oug4	AVC	-22.5153
	542	oug	oug4	AVC	-20.7034
	543	oug	oug4	AVC	-19.9235
	544	oug	oug4	AVC	-19.0081
	661	oug	oug5	AVC	0
	662	oug	oug5	AVC	2.63967
	663	oug	oug5	AVC	-1.92869
	664	oug	oug5	AVC	0.119251
	665	oug	oug5	AVC	-1.57453
	666	oug	oug5	AVC	2.19348
	667	oug	oug5	AVC	3.26831
	668	oug	oug5	AVC	4.51656
	669	oug	oug5	AVC	4.31009
	670	oug	oug5	AVC	6.52987
	671	oug	oug5	AVC	2.77591
	672	oug	oug5	AVC	5.66479
	673	oug	oug5	AVC	5.1164
	674	oug	oug5	AVC	6.47185
	675	oug	oug5	AVC	-0.696624
	676	oug	oug5	AVC	6.21085
	677	oug	oug5	AVC	5.02689
	678	oug	oug5	AVC	2.32172
	679	oug	oug5	AVC	0.655129
	680	oug	oug5	AVC	6.12495
	681	oug	oug5	AVC	10.8952
	682	oug	oug5	AVC	10.5638
	683	oug	oug5	AVC	11.8551
	684	oug	oug5	AVC	12.3143
	685	oug	oug5	AVC	9.73787
	686	oug	oug5	AVC	10.076
	687	oug	oug5	AVC	8.62695
	688	oug	oug5	AVC	8.09027
	689	oug	oug5	AVC	8.78184
	690	oug	oug5	AVC	12.9697
	691	oug	oug5	AVC	15.0373
	692	oug	oug5	AVC	11.5087
	693	oug	oug5	AVC	11.9998
	694	oug	oug5	AVC	14.8242
	695	oug	oug5	AVC	15.9867
	696	oug	oug5	AVC	14.2566
	697	oug	oug5	AVC	12.037
	698	oug	oug5	AVC	15.8907
	699	oug	oug5	AVC	0.351771
	700	oug	oug5	AVC	9.54416
	701	oug	oug5	AVC	10.0425
	702	oug	oug5	AVC	9.96767
	703	oug	oug5	AVC	14.7017
	704	oug	oug5	AVC	5.0541
	705	oug	oug5	AVC	9.57853
	706	oug	oug5	AVC	10.9913
	707	oug	oug5	AVC	11.694
	708	oug	oug5	AVC	12.3366
	709	oug	oug5	AVC	11.3436
	710	oug	oug5	AVC	15.0016
	711	oug	oug5	AVC	15.0081
	712	oug	oug5	AVC	12.8223
	713	oug	oug5	AVC	11.8326
	714	oug	oug5	AVC	9.74798
	715	oug	oug5	AVC	9.21396
	716	oug	oug5	AVC	8.80472
	717	oug	oug5	AVC	8.40689
	718	oug	oug5	AVC	9.63809
	719	oug	oug5	AVC	9.29869
	720	oug	oug5	AVC	9.5417
	721	oug	oug5	AVC	9.36132
