# Supplementary material for: Twisting of the zebrafish heart tube during cardiac looping is a tbx5-dependent and tissue-intrinsic process
Source: eLife. 2021 Aug 10;10:e61733. doi: 10.7554/eLife.61733 (PMC8354640; doi:10.7554/eLife.61733)
Supplement: Figure 4—source data 1. [file elife-61733-fig4-data1.xlsx]

## Sheet: Figure 4H
Column1	Column2	Column3	Column4	Column5	Column6
	genotype	replicate	Chamber	time_hr	total_rotation
0	oug	oug1	A	0	0
1	oug	oug1	A	0.191129	-2.02824
2	oug	oug1	A	0.382259	2.315
3	oug	oug1	A	0.573388	6.62779
4	oug	oug1	A	0.764518	5.34818
5	oug	oug1	A	0.955647	6.24938
6	oug	oug1	A	1.14678	1.24402
7	oug	oug1	A	1.33791	6.46154
8	oug	oug1	A	1.52904	8.65085
9	oug	oug1	A	1.72016	12.8033
10	oug	oug1	A	1.91129	8.71482
11	oug	oug1	A	2.10242	9.00827
12	oug	oug1	A	2.29355	10.0592
13	oug	oug1	A	2.48468	6.25029
14	oug	oug1	A	2.67581	4.21779
15	oug	oug1	A	2.86694	4.99877
16	oug	oug1	A	3.05807	9.93373
17	oug	oug1	A	3.2492	10.84
18	oug	oug1	A	3.44033	9.48547
19	oug	oug1	A	3.63146	9.77146
20	oug	oug1	A	3.82259	10.4288
21	oug	oug1	A	4.01372	12.9488
22	oug	oug1	A	4.20485	12.3607
23	oug	oug1	A	4.39598	12.0661
24	oug	oug1	A	4.58711	11.5731
25	oug	oug1	A	4.77824	10.7572
26	oug	oug1	A	4.96937	10.7059
27	oug	oug1	A	5.16049	9.76111
28	oug	oug1	A	5.35162	10.6865
29	oug	oug1	A	5.54275	8.93101
30	oug	oug1	A	5.73388	7.23107
31	oug	oug1	A	5.92501	7.65797
32	oug	oug1	A	6.11614	7.93303
33	oug	oug1	A	6.30727	7.81158
34	oug	oug1	A	6.4984	7.43643
35	oug	oug1	A	6.68953	8.73372
36	oug	oug1	A	6.88066	7.26096
37	oug	oug1	A	7.07179	5.98659
38	oug	oug1	A	7.26292	9.03499
39	oug	oug1	A	7.45405	7.11573
40	oug	oug1	A	7.64518	8.42803
41	oug	oug1	A	7.83631	8.93349
42	oug	oug1	A	8.02744	8.3978
43	oug	oug1	A	8.21857	7.33495
44	oug	oug1	A	8.4097	10.9338
45	oug	oug1	A	8.60082	9.58271
46	oug	oug1	A	8.79195	10.0816
47	oug	oug1	A	8.98308	11.0368
48	oug	oug1	A	9.17421	13.0405
49	oug	oug1	A	9.36534	11.2929
50	oug	oug1	A	9.55647	11.4212
51	oug	oug1	A	9.7476	12.8776
52	oug	oug1	A	9.93873	14.4301
53	oug	oug1	A	10.1299	12.8369
54	oug	oug1	A	10.321	14.6405
110	oug	oug1	V	0	0
111	oug	oug1	V	0.191129	-2.30807
112	oug	oug1	V	0.382259	0.441555
113	oug	oug1	V	0.573388	-2.19338
114	oug	oug1	V	0.764518	1.78424
115	oug	oug1	V	0.955647	-4.68927
116	oug	oug1	V	1.14678	-3.20028
117	oug	oug1	V	1.33791	-2.63931
118	oug	oug1	V	1.52904	0.613728
119	oug	oug1	V	1.72016	1.74135
120	oug	oug1	V	1.91129	-0.118984
121	oug	oug1	V	2.10242	-3.44295
122	oug	oug1	V	2.29355	-7.63263
123	oug	oug1	V	2.48468	-7.02458
124	oug	oug1	V	2.67581	-6.86353
125	oug	oug1	V	2.86694	-4.37623
126	oug	oug1	V	3.05807	-4.8856
127	oug	oug1	V	3.2492	-5.90815
128	oug	oug1	V	3.44033	-8.31399
129	oug	oug1	V	3.63146	-9.29888
130	oug	oug1	V	3.82259	-8.21695
131	oug	oug1	V	4.01372	-9.24913
132	oug	oug1	V	4.20485	-6.12159
133	oug	oug1	V	4.39598	-5.58563
134	oug	oug1	V	4.58711	-8.13416
135	oug	oug1	V	4.77824	-9.31623
136	oug	oug1	V	4.96937	-9.52041
137	oug	oug1	V	5.16049	-13.1679
138	oug	oug1	V	5.35162	-12.7511
139	oug	oug1	V	5.54275	-20.2978
140	oug	oug1	V	5.73388	-21.2047
141	oug	oug1	V	5.92501	-23.7176
142	oug	oug1	V	6.11614	-23.3743
143	oug	oug1	V	6.30727	-24.8592
144	oug	oug1	V	6.4984	-24.2997
145	oug	oug1	V	6.68953	-27.0087
146	oug	oug1	V	6.88066	-31.2348
147	oug	oug1	V	7.07179	-30.9546
148	oug	oug1	V	7.26292	-32.6802
149	oug	oug1	V	7.45405	-36.6407
150	oug	oug1	V	7.64518	-32.2654
151	oug	oug1	V	7.83631	-31.5058
152	oug	oug1	V	8.02744	-33.7177
153	oug	oug1	V	8.21857	-34.9177
154	oug	oug1	V	8.4097	-31.0429
155	oug	oug1	V	8.60082	-31.3946
156	oug	oug1	V	8.79195	-30.6267
157	oug	oug1	V	8.98308	-28.3803
158	oug	oug1	V	9.17421	-30.805
159	oug	oug1	V	9.36534	-32.3609
160	oug	oug1	V	9.55647	-31.048
161	oug	oug1	V	9.7476	-32.9601
162	oug	oug1	V	9.93873	-33.4134
163	oug	oug1	V	10.1299	-32.5798
164	oug	oug1	V	10.321	-32.6513
165	oug	oug2	A	0	0
166	oug	oug2	A	0.231988	5.45946
167	oug	oug2	A	0.463975	5.37551
168	oug	oug2	A	0.695963	8.52598
169	oug	oug2	A	0.92795	16.1042
170	oug	oug2	A	1.15994	14.3632
171	oug	oug2	A	1.39193	14.4856
172	oug	oug2	A	1.62391	10.4539
173	oug	oug2	A	1.8559	13.3273
174	oug	oug2	A	2.08789	12.034
175	oug	oug2	A	2.31988	11.8009
176	oug	oug2	A	2.55186	15.1367
177	oug	oug2	A	2.78385	16.576
178	oug	oug2	A	3.01584	18.1268
179	oug	oug2	A	3.24783	19.9092
180	oug	oug2	A	3.47981	18.3385
181	oug	oug2	A	3.7118	15.8747
182	oug	oug2	A	3.94379	15.1729
183	oug	oug2	A	4.17578	13.837
184	oug	oug2	A	4.40776	17.9709
185	oug	oug2	A	4.63975	20.4251
186	oug	oug2	A	4.87174	19.3786
187	oug	oug2	A	5.10373	18.8088
188	oug	oug2	A	5.33571	18.105
189	oug	oug2	A	5.5677	17.3872
190	oug	oug2	A	5.79969	15.8589
191	oug	oug2	A	6.03168	16.2907
192	oug	oug2	A	6.26366	19.0819
193	oug	oug2	A	6.49565	19.7572
194	oug	oug2	A	6.72764	22.454
195	oug	oug2	A	6.95963	23.0113
196	oug	oug2	A	7.19161	23.9587
197	oug	oug2	A	7.4236	24.5408
198	oug	oug2	A	7.65559	23.672
199	oug	oug2	A	7.88758	25.2183
200	oug	oug2	A	8.11956	25.8015
201	oug	oug2	A	8.35155	25.8887
202	oug	oug2	A	8.58354	25.6193
203	oug	oug2	A	8.81553	21.4589
204	oug	oug2	A	9.04751	21.3913
205	oug	oug2	A	9.2795	19.9474
206	oug	oug2	A	9.51149	21.0162
207	oug	oug2	A	9.74348	19.8343
208	oug	oug2	A	9.97546	21.3227
209	oug	oug2	A	10.2075	21.855
210	oug	oug2	A	10.4394	19.528
257	oug	oug2	V	0	0
258	oug	oug2	V	0.231988	5.42094
259	oug	oug2	V	0.463975	2.71822
260	oug	oug2	V	0.695963	3.65435
261	oug	oug2	V	0.92795	3.99226
262	oug	oug2	V	1.15994	10.8416
263	oug	oug2	V	1.39193	10.8529
264	oug	oug2	V	1.62391	15.9408
265	oug	oug2	V	1.8559	11.208
266	oug	oug2	V	2.08789	15.3143
267	oug	oug2	V	2.31988	18.635
268	oug	oug2	V	2.55186	22.1956
269	oug	oug2	V	2.78385	22.784
270	oug	oug2	V	3.01584	23.9122
271	oug	oug2	V	3.24783	26.6322
272	oug	oug2	V	3.47981	24.2705
273	oug	oug2	V	3.7118	21.6911
274	oug	oug2	V	3.94379	23.4732
275	oug	oug2	V	4.17578	22.2206
276	oug	oug2	V	4.40776	22.9551
277	oug	oug2	V	4.63975	24.2145
278	oug	oug2	V	4.87174	21.7356
279	oug	oug2	V	5.10373	21.3453
280	oug	oug2	V	5.33571	23.8474
281	oug	oug2	V	5.5677	22.0012
282	oug	oug2	V	5.79969	22.4051
283	oug	oug2	V	6.03168	23.2432
284	oug	oug2	V	6.26366	24.9765
285	oug	oug2	V	6.49565	22.6102
286	oug	oug2	V	6.72764	22.9528
287	oug	oug2	V	6.95963	25.3736
288	oug	oug2	V	7.19161	26.1236
289	oug	oug2	V	7.4236	23.8981
290	oug	oug2	V	7.65559	26.2916
291	oug	oug2	V	7.88758	28.1817
292	oug	oug2	V	8.11956	27.9059
293	oug	oug2	V	8.35155	32.7214
294	oug	oug2	V	8.58354	28.2464
295	oug	oug2	V	8.81553	25.0876
296	oug	oug2	V	9.04751	25.9167
297	oug	oug2	V	9.2795	17.7564
298	oug	oug2	V	9.51149	18.8279
299	oug	oug2	V	9.74348	15.8126
300	oug	oug2	V	9.97546	15.4617
301	oug	oug2	V	10.2075	13.8381
302	oug	oug2	V	10.4394	10.9757
303	oug	oug3	A	0.231983	0
304	oug	oug3	A	0.69595	3.87973
305	oug	oug3	A	0.927933	6.60192
306	oug	oug3	A	1.15992	7.84222
307	oug	oug3	A	1.3919	2.56665
308	oug	oug3	A	1.62388	11.7905
309	oug	oug3	A	1.85587	10.2396
310	oug	oug3	A	2.08785	18.8729
311	oug	oug3	A	2.31983	21.0886
312	oug	oug3	A	2.55182	24.4457
313	oug	oug3	A	2.7838	29.7158
314	oug	oug3	A	3.01578	32.0993
315	oug	oug3	A	3.24777	33.5819
316	oug	oug3	A	3.47975	38.4988
317	oug	oug3	A	3.71173	36.3938
318	oug	oug3	A	3.94372	40.1487
319	oug	oug3	A	4.1757	32.1331
320	oug	oug3	A	4.40768	36.6087
321	oug	oug3	A	4.63967	37.4804
322	oug	oug3	A	4.87165	38.6008
323	oug	oug3	A	5.10363	39.2419
324	oug	oug3	A	5.33562	40.5845
325	oug	oug3	A	5.5676	43.3464
326	oug	oug3	A	5.79958	41.7233
327	oug	oug3	A	6.03157	46.6064
328	oug	oug3	A	6.26355	44.824
329	oug	oug3	A	6.49553	48.6798
330	oug	oug3	A	6.72752	44.921
331	oug	oug3	A	6.9595	51.2136
332	oug	oug3	A	7.19148	46.18
333	oug	oug3	A	7.42347	48.5637
334	oug	oug3	A	7.65545	51.0411
335	oug	oug3	A	7.88743	51.7541
336	oug	oug3	A	8.11942	52.6709
337	oug	oug3	A	8.3514	48.2315
338	oug	oug3	A	8.58338	51.5176
339	oug	oug3	A	8.81537	54.4924
340	oug	oug3	A	9.04735	52.693
341	oug	oug3	A	9.27933	54.2312
342	oug	oug3	A	9.51132	53.4097
343	oug	oug3	A	9.7433	52.2167
344	oug	oug3	A	9.97528	52.3177
345	oug	oug3	A	10.2073	50.2685
346	oug	oug3	A	10.4393	43.1465
391	oug	oug3	V	0.231983	0
392	oug	oug3	V	0.69595	23.866
393	oug	oug3	V	0.927933	13.9747
394	oug	oug3	V	1.15992	10.8195
395	oug	oug3	V	1.3919	2.22819
396	oug	oug3	V	1.62388	7.80912
397	oug	oug3	V	1.85587	8.02453
398	oug	oug3	V	2.08785	3.80022
399	oug	oug3	V	2.31983	8.99262
400	oug	oug3	V	2.55182	8.2983
401	oug	oug3	V	2.7838	10.3523
402	oug	oug3	V	3.01578	7.66526
403	oug	oug3	V	3.24777	5.68691
404	oug	oug3	V	3.47975	7.19292
405	oug	oug3	V	3.71173	7.92386
406	oug	oug3	V	3.94372	6.26841
407	oug	oug3	V	4.1757	6.81369
408	oug	oug3	V	4.40768	7.70889
409	oug	oug3	V	4.63967	9.83405
410	oug	oug3	V	4.87165	6.3542
411	oug	oug3	V	5.10363	7.91832
412	oug	oug3	V	5.33562	8.532
413	oug	oug3	V	5.5676	0.787681
414	oug	oug3	V	5.79958	-1.58344
415	oug	oug3	V	6.03157	-1.17629
416	oug	oug3	V	6.26355	-2.29728
417	oug	oug3	V	6.49553	-5.04173
418	oug	oug3	V	6.72752	-5.06895
419	oug	oug3	V	6.9595	3.08692
420	oug	oug3	V	7.19148	0.449344
421	oug	oug3	V	7.42347	0.586789
422	oug	oug3	V	7.65545	2.94261
423	oug	oug3	V	7.88743	0.869903
424	oug	oug3	V	8.11942	1.03958
425	oug	oug3	V	8.3514	1.58653
426	oug	oug3	V	8.58338	2.09875
427	oug	oug3	V	8.81537	-2.37431
428	oug	oug3	V	9.04735	-7.94554
429	oug	oug3	V	9.27933	-5.7574
430	oug	oug3	V	9.51132	-8.65522
431	oug	oug3	V	9.7433	-11.374
432	oug	oug3	V	9.97528	-16.0642
433	oug	oug3	V	10.2073	-18.1858
434	oug	oug3	V	10.4393	-18.4376
435	oug	oug4	A	1.00024	0
436	oug	oug4	A	1.16695	-3.79259
437	oug	oug4	A	1.33365	-1.27909
438	oug	oug4	A	1.50036	-5.02295
439	oug	oug4	A	1.66707	-3.11385
440	oug	oug4	A	1.83377	-1.09236
441	oug	oug4	A	2.00048	-3.72897
442	oug	oug4	A	2.16719	-3.06387
443	oug	oug4	A	2.33389	-0.379477
444	oug	oug4	A	2.5006	2.63227
445	oug	oug4	A	2.66731	2.11938
446	oug	oug4	A	2.83401	3.07767
447	oug	oug4	A	3.00072	4.27937
448	oug	oug4	A	3.16743	2.926
449	oug	oug4	A	3.33413	2.77503
450	oug	oug4	A	3.50084	2.80413
451	oug	oug4	A	3.66755	2.30921
452	oug	oug4	A	3.83425	2.18418
453	oug	oug4	A	4.00096	2.7897
454	oug	oug4	A	4.16767	1.98404
455	oug	oug4	A	4.33437	1.68925
456	oug	oug4	A	4.50108	0.707816
457	oug	oug4	A	4.66779	1.11012
458	oug	oug4	A	4.83449	0.330933
459	oug	oug4	A	5.0012	-1.46724
460	oug	oug4	A	5.16791	-2.78227
461	oug	oug4	A	5.33461	-1.59564
462	oug	oug4	A	5.50132	-1.10138
463	oug	oug4	A	5.66803	-2.19554
464	oug	oug4	A	5.83473	-2.70235
465	oug	oug4	A	6.00144	-3.48943
466	oug	oug4	A	6.16815	-1.81731
467	oug	oug4	A	6.33485	-0.809341
468	oug	oug4	A	6.50156	1.65459
469	oug	oug4	A	6.66827	1.50751
470	oug	oug4	A	6.83497	0.870604
471	oug	oug4	A	7.00168	1.70551
472	oug	oug4	A	7.16839	1.60855
473	oug	oug4	A	7.33509	1.39541
474	oug	oug4	A	7.5018	3.21654
475	oug	oug4	A	7.66851	2.3211
476	oug	oug4	A	7.83521	2.37059
477	oug	oug4	A	8.00192	1.38442
478	oug	oug4	A	8.16863	4.37638
479	oug	oug4	A	8.33533	5.84462
480	oug	oug4	A	8.50204	8.82595
481	oug	oug4	A	8.66875	9.23506
482	oug	oug4	A	8.83545	11.0018
483	oug	oug4	A	9.00216	12.2175
484	oug	oug4	A	9.16887	12.465
485	oug	oug4	A	9.33557	13.2203
486	oug	oug4	A	9.50228	14.8107
487	oug	oug4	A	9.66899	15.2704
488	oug	oug4	A	9.83569	15.1391
489	oug	oug4	A	10.0024	14.9091
545	oug	oug4	V	1.00024	0
546	oug	oug4	V	1.16695	-0.450225
547	oug	oug4	V	1.33365	-0.236024
548	oug	oug4	V	1.50036	5.15315
549	oug	oug4	V	1.66707	5.40499
550	oug	oug4	V	1.83377	3.062
551	oug	oug4	V	2.00048	3.43905
552	oug	oug4	V	2.16719	1.42052
553	oug	oug4	V	2.33389	6.46354
554	oug	oug4	V	2.5006	8.98803
555	oug	oug4	V	2.66731	7.45915
556	oug	oug4	V	2.83401	8.40091
557	oug	oug4	V	3.00072	11.0156
558	oug	oug4	V	3.16743	8.05608
559	oug	oug4	V	3.33413	9.40302
560	oug	oug4	V	3.50084	7.70366
561	oug	oug4	V	3.66755	6.00563
562	oug	oug4	V	3.83425	3.45815
563	oug	oug4	V	4.00096	4.71349
564	oug	oug4	V	4.16767	5.90067
565	oug	oug4	V	4.33437	4.40514
566	oug	oug4	V	4.50108	1.38694
567	oug	oug4	V	4.66779	3.12946
568	oug	oug4	V	4.83449	3.36692
569	oug	oug4	V	5.0012	1.96784
570	oug	oug4	V	5.16791	2.98683
571	oug	oug4	V	5.33461	1.34459
572	oug	oug4	V	5.50132	1.24578
573	oug	oug4	V	5.66803	0.517982
574	oug	oug4	V	5.83473	-1.18985
575	oug	oug4	V	6.00144	-2.42909
576	oug	oug4	V	6.16815	-3.01916
577	oug	oug4	V	6.33485	-3.32364
578	oug	oug4	V	6.50156	-2.91943
579	oug	oug4	V	6.66827	-5.33805
580	oug	oug4	V	6.83497	-5.415
581	oug	oug4	V	7.00168	-5.79538
582	oug	oug4	V	7.16839	-4.61986
583	oug	oug4	V	7.33509	-6.51517
584	oug	oug4	V	7.5018	-8.32025
585	oug	oug4	V	7.66851	-10.404
586	oug	oug4	V	7.83521	-11.6337
587	oug	oug4	V	8.00192	-14.4496
588	oug	oug4	V	8.16863	-13.1419
589	oug	oug4	V	8.33533	-14.3906
590	oug	oug4	V	8.50204	-16.0433
591	oug	oug4	V	8.66875	-18.5051
592	oug	oug4	V	8.83545	-18.6155
593	oug	oug4	V	9.00216	-16.0369
594	oug	oug4	V	9.16887	-18.19
595	oug	oug4	V	9.33557	-17.7876
596	oug	oug4	V	9.50228	-16.0778
597	oug	oug4	V	9.66899	-15.4956
598	oug	oug4	V	9.83569	-14.6139
599	oug	oug4	V	10.0024	-15.1313
600	oug	oug5	A	0	0
601	oug	oug5	A	0.166564	1.50641
602	oug	oug5	A	0.333127	2.86129
603	oug	oug5	A	0.499691	3.61057
604	oug	oug5	A	0.666254	3.38264
605	oug	oug5	A	0.832818	4.75564
606	oug	oug5	A	0.999382	4.4347
607	oug	oug5	A	1.16595	5.5026
608	oug	oug5	A	1.33251	6.443
609	oug	oug5	A	1.49907	9.23218
610	oug	oug5	A	1.66564	11.3555
611	oug	oug5	A	1.8322	11.6084
612	oug	oug5	A	1.99876	13.0234
613	oug	oug5	A	2.16533	12.774
614	oug	oug5	A	2.33189	13.0633
615	oug	oug5	A	2.49845	15.8029
616	oug	oug5	A	2.66502	15.9937
617	oug	oug5	A	2.83158	18.2021
618	oug	oug5	A	2.99815	19.0536
619	oug	oug5	A	3.16471	21.2258
620	oug	oug5	A	3.33127	22.9689
621	oug	oug5	A	3.49784	22.6871
622	oug	oug5	A	3.6644	22.4153
623	oug	oug5	A	3.83096	22.7933
624	oug	oug5	A	3.99753	22.1593
625	oug	oug5	A	4.16409	22.6404
626	oug	oug5	A	4.33065	22.7851
627	oug	oug5	A	4.49722	23.2055
628	oug	oug5	A	4.66378	25.4986
629	oug	oug5	A	4.83034	26.6346
630	oug	oug5	A	4.99691	26.2719
631	oug	oug5	A	5.16347	26.2852
632	oug	oug5	A	5.33004	26.82
633	oug	oug5	A	5.4966	25.5035
634	oug	oug5	A	5.66316	26.1859
635	oug	oug5	A	5.82973	25.7475
636	oug	oug5	A	5.99629	25.9623
637	oug	oug5	A	6.16285	27.1381
638	oug	oug5	A	6.32942	25.0998
639	oug	oug5	A	6.49598	25.8219
640	oug	oug5	A	6.66254	25.3964
641	oug	oug5	A	6.82911	23.9447
642	oug	oug5	A	6.99567	24.5301
643	oug	oug5	A	7.16224	23.1068
644	oug	oug5	A	7.3288	23.9366
645	oug	oug5	A	7.49536	25.0998
646	oug	oug5	A	7.66193	23.8094
647	oug	oug5	A	7.82849	24.4927
648	oug	oug5	A	7.99505	22.5737
649	oug	oug5	A	8.16162	20.4963
650	oug	oug5	A	8.32818	19.9175
651	oug	oug5	A	8.49474	18.2156
652	oug	oug5	A	8.66131	18.2171
653	oug	oug5	A	8.82787	16.7945
654	oug	oug5	A	8.99444	16.3459
655	oug	oug5	A	9.161	16.5902
656	oug	oug5	A	9.32756	15.5132
657	oug	oug5	A	9.49413	16.8862
658	oug	oug5	A	9.66069	14.4782
659	oug	oug5	A	9.82725	17.0667
660	oug	oug5	A	9.99382	16.3119
722	oug	oug5	V	0	0
723	oug	oug5	V	0.166564	3.58871
724	oug	oug5	V	0.333127	-0.181223
725	oug	oug5	V	0.499691	0.546107
726	oug	oug5	V	0.666254	7.47521
727	oug	oug5	V	0.832818	2.8892
728	oug	oug5	V	0.999382	0.228662
729	oug	oug5	V	1.16595	-0.719779
730	oug	oug5	V	1.33251	-7.30455
731	oug	oug5	V	1.49907	-9.64865
732	oug	oug5	V	1.66564	-6.58345
733	oug	oug5	V	1.8322	-6.26008
734	oug	oug5	V	1.99876	-7.97256
735	oug	oug5	V	2.16533	-6.9796
736	oug	oug5	V	2.33189	-1.28299
737	oug	oug5	V	2.49845	-7.58318
738	oug	oug5	V	2.66502	-7.87904
739	oug	oug5	V	2.83158	-6.00552
740	oug	oug5	V	2.99815	-7.55037
741	oug	oug5	V	3.16471	-2.08763
742	oug	oug5	V	3.33127	0.006525
743	oug	oug5	V	3.49784	0.680345
744	oug	oug5	V	3.6644	1.39935
745	oug	oug5	V	3.83096	0.846281
746	oug	oug5	V	3.99753	1.82471
747	oug	oug5	V	4.16409	1.04065
748	oug	oug5	V	4.33065	1.441
749	oug	oug5	V	4.49722	1.49876
750	oug	oug5	V	4.66378	2.66392
751	oug	oug5	V	4.83034	2.37238
752	oug	oug5	V	4.99691	3.40957
753	oug	oug5	V	5.16347	1.67176
754	oug	oug5	V	5.33004	2.88877
755	oug	oug5	V	5.4966	1.97676
756	oug	oug5	V	5.66316	2.05384
757	oug	oug5	V	5.82973	4.67881
758	oug	oug5	V	5.99629	3.95662
759	oug	oug5	V	6.16285	3.77787
760	oug	oug5	V	6.32942	5.88754
761	oug	oug5	V	6.49598	5.51087
762	oug	oug5	V	6.66254	4.50103
763	oug	oug5	V	6.82911	1.14415
764	oug	oug5	V	6.99567	3.41448
765	oug	oug5	V	7.16224	4.90509
766	oug	oug5	V	7.3288	3.12385
767	oug	oug5	V	7.49536	4.12942
768	oug	oug5	V	7.66193	2.95069
769	oug	oug5	V	7.82849	-0.303294
770	oug	oug5	V	7.99505	-2.05256
771	oug	oug5	V	8.16162	-2.87434
772	oug	oug5	V	8.32818	-4.92491
773	oug	oug5	V	8.49474	-5.76429
774	oug	oug5	V	8.66131	-8.50724
775	oug	oug5	V	8.82787	-9.27413
776	oug	oug5	V	8.99444	-8.34293
777	oug	oug5	V	9.161	-12.7044
778	oug	oug5	V	9.32756	-15.8634
779	oug	oug5	V	9.49413	-7.46203
780	oug	oug5	V	9.66069	-9.17941
781	oug	oug5	V	9.82725	-8.27613
782	oug	oug5	V	9.99382	-7.63571

## Sheet: Figure 4I
Column1	Column2	Column3	Column4	Column5	Column6	Column7	Column8	Column9	Column10
	index	ec	replicate	chamber	time_intervals	angular velocity	group	catrep	timerep
105	0	oug	oug1	A	0.0	4.28822	ougA	oug1 A	0.0 A
106	1	oug	oug1	A	1.5	-4.66118	ougA	oug1 A	1.5 A
107	2	oug	oug1	A	3.0	2.09143	ougA	oug1 A	3.0 A
108	3	oug	oug1	A	4.5	-3.07921	ougA	oug1 A	4.5 A
109	4	oug	oug1	A	6.0	-0.337986	ougA	oug1 A	6.0 A
110	5	oug	oug1	A	7.5	1.94058	ougA	oug1 A	7.5 A
111	6	oug	oug1	A	9.0	2.03622	ougA	oug1 A	9.0 A
119	16	oug	oug1	V	0.0	-2.01308	ougV	oug1 V	0.0 V
120	17	oug	oug1	V	1.5	-6.40681	ougV	oug1 V	1.5 V
121	18	oug	oug1	V	3.0	-0.479041	ougV	oug1 V	3.0 V
122	19	oug	oug1	V	4.5	-12.4848	ougV	oug1 V	4.5 V
123	20	oug	oug1	V	6.0	-9.72671	ougV	oug1 V	6.0 V
124	21	oug	oug1	V	7.5	2.64314	ougV	oug1 V	7.5 V
125	22	oug	oug1	V	9.0	-1.55883	ougV	oug1 V	9.0 V
126	24	oug	oug2	A	0.0	9.81238	ougA	oug2 A	0.0 A
127	25	oug	oug2	A	1.5	4.40978	ougA	oug2 A	1.5 A
128	26	oug	oug2	A	3.0	-2.42898	ougA	oug2 A	3.0 A
129	27	oug	oug2	A	4.5	-3.63437	ougA	oug2 A	4.5 A
130	28	oug	oug2	A	6.0	5.81281	ougA	oug2 A	6.0 A
131	29	oug	oug2	A	7.5	-1.20391	ougA	oug2 A	7.5 A
132	30	oug	oug2	A	9.0	-0.226031	ougA	oug2 A	9.0 A
140	40	oug	oug2	V	0.0	6.38802	ougV	oug2 V	0.0 V
141	41	oug	oug2	V	1.5	8.68272	ougV	oug2 V	1.5 V
142	42	oug	oug2	V	3.0	-1.92311	ougV	oug2 V	3.0 V
143	43	oug	oug2	V	4.5	-0.707978	ougV	oug2 V	4.5 V
144	44	oug	oug2	V	6.0	1.0811	ougV	oug2 V	6.0 V
145	45	oug	oug2	V	7.5	-0.124415	ougV	oug2 V	7.5 V
146	46	oug	oug2	V	9.0	-8.62515	ougV	oug2 V	9.0 V
147	48	oug	oug3	A	0.0	3.86616	ougA	oug3 A	0.0 A
148	49	oug	oug3	A	1.5	16.5604	ougA	oug3 A	1.5 A
149	50	oug	oug3	A	3.0	1.89059	ougA	oug3 A	3.0 A
150	51	oug	oug3	A	4.5	4.5316	ougA	oug3 A	4.5 A
151	52	oug	oug3	A	6.0	1.71156	ougA	oug3 A	6.0 A
152	53	oug	oug3	A	7.5	1.49124	ougA	oug3 A	7.5 A
153	54	oug	oug3	A	9.0	-5.79735	ougA	oug3 A	9.0 A
161	64	oug	oug3	V	0.0	0.462386	ougV	oug3 V	0.0 V
162	65	oug	oug3	V	1.5	2.30679	ougV	oug3 V	1.5 V
163	66	oug	oug3	V	3.0	0.224762	ougV	oug3 V	3.0 V
164	67	oug	oug3	V	4.5	-9.01214	ougV	oug3 V	4.5 V
165	68	oug	oug3	V	6.0	2.91141	ougV	oug3 V	6.0 V
166	69	oug	oug3	V	7.5	-2.7528	ougV	oug3 V	7.5 V
167	70	oug	oug3	V	9.0	-9.8132	ougV	oug3 V	9.0 V
168	72	oug	oug4	A	0.0	-3.83635	ougA	oug4 A	0.0 A
169	73	oug	oug4	A	1.5	5.88868	ougA	oug4 A	1.5 A
170	74	oug	oug4	A	3.0	-1.37737	ougA	oug4 A	3.0 A
171	75	oug	oug4	A	4.5	-2.65443	ougA	oug4 A	4.5 A
172	76	oug	oug4	A	6.0	3.40545	ougA	oug4 A	6.0 A
173	77	oug	oug4	A	7.5	6.92371	ougA	oug4 A	7.5 A
174	78	oug	oug4	A	9.0	3.3149	ougA	oug4 A	9.0 A
182	88	oug	oug4	V	0.0	-0.707903	ougV	oug4 V	0.0 V
183	89	oug	oug4	V	1.5	3.40219	ougV	oug4 V	1.5 V
184	90	oug	oug4	V	3.0	-4.65213	ougV	oug4 V	3.0 V
185	91	oug	oug4	V	4.5	-2.30016	ougV	oug4 V	4.5 V
186	92	oug	oug4	V	6.0	-2.85786	ougV	oug4 V	6.0 V
187	93	oug	oug4	V	7.5	-7.42268	ougV	oug4 V	7.5 V
188	94	oug	oug4	V	9.0	2.60525	ougV	oug4 V	9.0 V
189	96	oug	oug5	A	0.0	4.65131	ougA	oug5 A	0.0 A
190	97	oug	oug5	A	1.5	5.95793	ougA	oug5 A	1.5 A
191	98	oug	oug5	A	3.0	0.702212	ougA	oug5 A	3.0 A
192	99	oug	oug5	A	4.5	-0.176106	ougA	oug5 A	4.5 A
193	100	oug	oug5	A	6.0	-1.79506	ougA	oug5 A	6.0 A
194	101	oug	oug5	A	7.5	-6.39819	ougA	oug5 A	7.5 A
195	102	oug	oug5	A	9.0	0.147714	ougA	oug5 A	9.0 A
203	112	oug	oug5	V	0.0	-8.41498	ougV	oug5 V	0.0 V
204	113	oug	oug5	V	1.5	-0.35227	ougV	oug5 V	1.5 V
205	114	oug	oug5	V	3.0	1.98072	ougV	oug5 V	3.0 V
206	115	oug	oug5	V	4.5	0.968963	ougV	oug5 V	4.5 V
207	116	oug	oug5	V	6.0	-0.918869	ougV	oug5 V	6.0 V
208	117	oug	oug5	V	7.5	-8.79407	ougV	oug5 V	7.5 V
209	118	oug	oug5	V	9.0	7.95711	ougV	oug5 V	9.0 V

## Sheet: Figure 4J
Column1	Column2	Column3	Column4	Column5
	genotype	replicate	time_intervals	twisting angle
0	wt	wt1	0.0	-2.5048
1	wt	wt1	0.5	3.22102
2	wt	wt1	1.0	17.5332
3	wt	wt1	1.5	28.295
4	wt	wt1	2.0	35.8833
5	wt	wt1	2.5	48.7685
6	wt	wt1	3.0	52.2578
7	wt	wt1	3.5	58.3061
8	wt	wt1	4.0	61.9882
9	wt	wt1	4.5	67.7461
10	wt	wt1	5.0	73.8415
11	wt	wt1	5.5	78.6046
12	wt	wt1	6.0	81.9322
13	wt	wt1	6.5	86.8399
14	wt	wt1	7.0	89.1754
15	wt	wt1	7.5	95.9691
16	wt	wt1	8.0	103.489
17	wt	wt1	8.5	109.619
18	wt	wt1	9.0	109.789
19	wt	wt1	9.5	111.642
20	wt	wt1	10.0	115.518
21	wt	wt1	10.5
22	wt	wt1	11.0
23	wt	wt1	11.5
24	wt	wt2	0.0	-0.73187
25	wt	wt2	0.5	9.57257
26	wt	wt2	1.0	7.79019
27	wt	wt2	1.5	0.153094
28	wt	wt2	2.0	3.91039
29	wt	wt2	2.5	4.98388
30	wt	wt2	3.0	0.828822
31	wt	wt2	3.5	5.58623
32	wt	wt2	4.0	10.3175
33	wt	wt2	4.5	13.5665
34	wt	wt2	5.0	21.9286
35	wt	wt2	5.5	21.5438
36	wt	wt2	6.0	22.8715
37	wt	wt2	6.5	29.3075
38	wt	wt2	7.0	20.6499
39	wt	wt2	7.5	29.2793
40	wt	wt2	8.0	32.673
41	wt	wt2	8.5	33.9211
42	wt	wt2	9.0	33.7326
43	wt	wt2	9.5	38.9723
44	wt	wt2	10.0	36.5764
45	wt	wt2	10.5
46	wt	wt2	11.0
47	wt	wt2	11.5
48	wt	wt3	0.0	0
49	wt	wt3	0.5	-3.73034
50	wt	wt3	1.0	12.0808
51	wt	wt3	1.5	21.6679
52	wt	wt3	2.0	24.3972
53	wt	wt3	2.5	29.9186
54	wt	wt3	3.0	34.7354
55	wt	wt3	3.5	37.3095
56	wt	wt3	4.0	44.9879
57	wt	wt3	4.5	50.3902
58	wt	wt3	5.0	46.1432
59	wt	wt3	5.5	52.8371
60	wt	wt3	6.0	45.848
61	wt	wt3	6.5	76.3877
62	wt	wt3	7.0	82.3187
63	wt	wt3	7.5	87.8975
64	wt	wt3	8.0	80.4555
65	wt	wt3	8.5	72.8775
66	wt	wt3	9.0	71.5319
67	wt	wt3	9.5	93.7029
68	wt	wt3	10.0
69	wt	wt3	10.5
70	wt	wt3	11.0
71	wt	wt3	11.5
72	wt	wt4	0.0	-0.383346
73	wt	wt4	0.5	9.93801
74	wt	wt4	1.0	2.1077
75	wt	wt4	1.5	-0.216613
76	wt	wt4	2.0	5.74329
77	wt	wt4	2.5	4.95537
78	wt	wt4	3.0	10.3634
79	wt	wt4	3.5	11.699
80	wt	wt4	4.0	18.4459
81	wt	wt4	4.5	25.146
82	wt	wt4	5.0	17.8928
83	wt	wt4	5.5	18.1538
84	wt	wt4	6.0	24.0709
85	wt	wt4	6.5	33.5835
86	wt	wt4	7.0	35.2346
87	wt	wt4	7.5	43.9
88	wt	wt4	8.0	48.7615
89	wt	wt4	8.5	54.0858
90	wt	wt4	9.0	64.962
91	wt	wt4	9.5	70.4605
92	wt	wt4	10.0	71.4383
93	wt	wt4	10.5
94	wt	wt4	11.0
95	wt	wt4	11.5
96	wt	wt5	0.0	0.119275
97	wt	wt5	0.5	2.24887
98	wt	wt5	1.0	4.08236
99	wt	wt5	1.5	-1.17926
100	wt	wt5	2.0	6.23788
101	wt	wt5	2.5	11.4475
102	wt	wt5	3.0	4.64234
103	wt	wt5	3.5	12.8166
104	wt	wt5	4.0	15.3913
105	wt	wt5	4.5	22.3997
106	wt	wt5	5.0	28.398
107	wt	wt5	5.5	32.716
108	wt	wt5	6.0	32.8477
109	wt	wt5	6.5	37.68
110	wt	wt5	7.0	41.4737
111	wt	wt5	7.5	41.9861
112	wt	wt5	8.0	46.1076
113	wt	wt5	8.5	49.3041
114	wt	wt5	9.0	57.4408
115	wt	wt5	9.5	62.6859
116	wt	wt5	10.0	65.5971
117	wt	wt5	10.5
118	wt	wt5	11.0
119	wt	wt5	11.5
0	oug	oug1	0.0	-1.31378
1	oug	oug1	0.5	6.30933
2	oug	oug1	1.0	0.868323
3	oug	oug1	1.5	8.8521
4	oug	oug1	2.0	13.8401
5	oug	oug1	2.5	12.6509
6	oug	oug1	3.0	14.5128
7	oug	oug1	3.5	19.3624
8	oug	oug1	4.0	21.8802
9	oug	oug1	4.5	19.6246
10	oug	oug1	5.0	22.502
11	oug	oug1	5.5	28.3665
12	oug	oug1	6.0	31.5601
13	oug	oug1	6.5	33.0121
14	oug	oug1	7.0	36.1167
15	oug	oug1	7.5	40.8864
16	oug	oug1	8.0	42.1943
17	oug	oug1	8.5	41.5592
18	oug	oug1	9.0	44.0202
19	oug	oug1	9.5	41.9023
20	oug	oug1	10.0	44.1427
21	oug	oug1	10.5
22	oug	oug1	11.0
23	oug	oug1	11.5
24	oug	oug2	0.0	-2.58027
25	oug	oug2	0.5	-1.24436
26	oug	oug2	1.0	3.44511
27	oug	oug2	1.5	7.28555
28	oug	oug2	2.0	1.93395
29	oug	oug2	2.5	7.24912
30	oug	oug2	3.0	6.06854
31	oug	oug2	3.5	3.54847
32	oug	oug2	4.0	10.9593
33	oug	oug2	4.5	4.65227
34	oug	oug2	5.0	1.10308
35	oug	oug2	5.5	4.05006
36	oug	oug2	6.0	7.56299
37	oug	oug2	6.5	-1.32966
38	oug	oug2	7.0	3.42221
39	oug	oug2	7.5	2.38899
40	oug	oug2	8.0	-0.332481
41	oug	oug2	8.5	2.26644
42	oug	oug2	9.0	5.00342
43	oug	oug2	9.5	2.09635
44	oug	oug2	10.0	7.53814
45	oug	oug2	10.5
46	oug	oug2	11.0
47	oug	oug2	11.5
48	oug	oug3	0.0	0
49	oug	oug3	0.5	30.6405
50	oug	oug3	1.0	4.79628
51	oug	oug3	1.5	4.92463
52	oug	oug3	2.0	16.1999
53	oug	oug3	2.5	15.429
54	oug	oug3	3.0	24.2086
55	oug	oug3	3.5	23.5318
56	oug	oug3	4.0	22.6076
57	oug	oug3	4.5	24.8767
58	oug	oug3	5.0	30.998
59	oug	oug3	5.5	42.3408
60	oug	oug3	6.0	46.1684
61	oug	oug3	6.5	51.8174
62	oug	oug3	7.0	43.8766
63	oug	oug3	7.5	46.2317
64	oug	oug3	8.0	54.1982
65	oug	oug3	8.5	46.7419
66	oug	oug3	9.0	60.7712
67	oug	oug3	9.5	61.3666
68	oug	oug3	10.0	74.5927
69	oug	oug3	10.5
70	oug	oug3	11.0
71	oug	oug3	11.5
72	oug	oug4	0.0
73	oug	oug4	0.5
74	oug	oug4	1.0	0.939527
75	oug	oug4	1.5	10.6338
76	oug	oug4	2.0	6.32811
77	oug	oug4	2.5	6.19105
78	oug	oug4	3.0	6.21909
79	oug	oug4	3.5	5.11189
80	oug	oug4	4.0	2.45377
81	oug	oug4	4.5	0.725423
82	oug	oug4	5.0	4.29734
83	oug	oug4	5.5	2.61169
84	oug	oug4	6.0	0.858912
85	oug	oug4	6.5	5.03792
86	oug	oug4	7.0	7.00638
87	oug	oug4	7.5	11.5083
88	oug	oug4	8.0	15.6366
89	oug	oug4	8.5	25.0059
90	oug	oug4	9.0	28.5778
91	oug	oug4	9.5	31.0447
92	oug	oug4	10.0	30.0368
93	oug	oug4	10.5
94	oug	oug4	11.0
95	oug	oug4	11.5
96	oug	oug5	0.0	1.7476
97	oug	oug5	0.5	3.27497
98	oug	oug5	1.0	0.315297
99	oug	oug5	1.5	15.886
100	oug	oug5	2.0	15.543
101	oug	oug5	2.5	22.1762
102	oug	oug5	3.0	24.0603
103	oug	oug5	3.5	21.7761
104	oug	oug5	4.0	21.444
105	oug	oug5	4.5	23.2923
106	oug	oug5	5.0	25.1004
107	oug	oug5	5.5	24.5068
108	oug	oug5	6.0	23.9765
109	oug	oug5	6.5	21.3863
110	oug	oug5	7.0	17.2623
111	oug	oug5	7.5	19.7119
112	oug	oug5	8.0	23.4641
113	oug	oug5	8.5	27.8306
114	oug	oug5	9.0	33.2035
115	oug	oug5	9.5	24.0311
116	oug	oug5	10.0
117	oug	oug5	10.5
118	oug	oug5	11.0
119	oug	oug5	11.5

## Sheet: Figure 4K
Column1	Column2	Column3	Column4	Column5	Column6	Column7	Column8	Column9
	genotype	replicate	level_1	time_intervals	angular velocity	intercepts	mean total twist	ecrep
0	wt	wt1	19.5	9.75	5.60276	58.9103	113.58	wt wt1
1	wt	wt2	19.5	9.75	1.58999	21.3299	37.7744	wt wt2
2	wt	wt3	19.0	9.5	4.91106	47.0478	93.7029	wt wt3
3	wt	wt4	19.5	9.75	7.0351	1.64136	70.9494	wt wt4
4	wt	wt5	19.5	9.75	4.65993	18.6864	64.1415	wt wt5
0	oug	oug1	19.5	9.75	11.9351	-72.8139	43.0225	oug oug1
1	oug	oug2	19.5	9.75	5.11188	-44.3226	4.81724	oug oug2
2	oug	oug3	19.5	9.75	-8.00012	151.385	67.9796	oug oug3
3	oug	oug4	19.5	9.75	-0.952043	39.2098	30.5408	oug oug4
4	oug	oug5	19.0	9.5	0.870562	15.7608	24.0311	oug oug5

## Sheet: Figure 4L
Column1	Column2	Column3	Column4	Column5	Column6	Column7	Column8
	index	genotype	replicate	time_intervals	angular velocity	ecrep	ectime
0	0	wt	wt1	0.0	18.1132	wt wt1	wt 0.0
1	1	wt	wt1	1.5	18.4996	wt wt1	wt 1.5
2	2	wt	wt1	3.0	10.6563	wt wt1	wt 3.0
3	3	wt	wt1	4.5	8.90774	wt wt1	wt 4.5
4	4	wt	wt1	6.0	8.43853	wt wt1	wt 6.0
5	5	wt	wt1	7.5	11.6864	wt wt1	wt 7.5
6	6	wt	wt1	9.0	5.19919	wt wt1	wt 9.0
7	8	wt	wt2	0.0	-1.97146	wt wt2	wt 0.0
8	9	wt	wt2	1.5	1.90736	wt wt2	wt 1.5
9	10	wt	wt2	3.0	7.89194	wt wt2	wt 3.0
10	11	wt	wt2	4.5	5.33217	wt wt2	wt 4.5
11	12	wt	wt2	6.0	1.88286	wt wt2	wt 6.0
12	13	wt	wt2	7.5	3.12952	wt wt2	wt 7.5
13	14	wt	wt2	9.0	3.97896	wt wt2	wt 9.0
14	16	wt	wt3	0.0	21.4156	wt wt3	wt 0.0
15	17	wt	wt3	1.5	10.4371	wt wt3	wt 1.5
16	18	wt	wt3	3.0	8.36425	wt wt3	wt 3.0
17	19	wt	wt3	4.5	-0.346554	wt wt3	wt 4.5
18	20	wt	wt3	6.0	24.1719	wt wt3	wt 6.0
19	21	wt	wt3	7.5	-10.7107	wt wt3	wt 7.5
20	22	wt	wt3	9.0	38.2866	wt wt3	wt 9.0
21	24	wt	wt4	0.0	2.375	wt wt4	wt 0.0
22	25	wt	wt4	1.5	6.38581	wt wt4	wt 1.5
23	26	wt	wt4	3.0	6.42483	wt wt4	wt 3.0
24	27	wt	wt4	4.5	0.39038	wt wt4	wt 4.5
25	28	wt	wt4	6.0	11.5956	wt wt4	wt 6.0
26	29	wt	wt4	7.5	12.8266	wt wt4	wt 7.5
27	30	wt	wt4	9.0	7.6346	wt wt4	wt 9.0
28	32	wt	wt5	0.0	0.195509	wt wt5	wt 0.0
29	33	wt	wt5	1.5	4.35711	wt wt5	wt 1.5
30	34	wt	wt5	3.0	9.52423	wt wt5	wt 3.0
31	35	wt	wt5	4.5	7.48285	wt wt5	wt 4.5
32	36	wt	wt5	6.0	6.9642	wt wt5	wt 6.0
33	37	wt	wt5	7.5	9.86273	wt wt5	wt 7.5
34	38	wt	wt5	9.0	6.79736	wt wt5	wt 9.0
35	0	oug	oug1	0.0	6.30131	oug oug1	oug 0.0
36	1	oug	oug1	1.5	1.74563	oug oug1	oug 1.5
37	2	oug	oug1	3.0	2.57047	oug oug1	oug 3.0
38	3	oug	oug1	4.5	9.40559	oug oug1	oug 4.5
39	4	oug	oug1	6.0	9.38873	oug oug1	oug 6.0
40	5	oug	oug1	7.5	-0.702554	oug oug1	oug 7.5
41	6	oug	oug1	9.0	3.59506	oug oug1	oug 9.0
42	8	oug	oug2	0.0	3.42436	oug oug2	oug 0.0
43	9	oug	oug2	1.5	2.70688	oug oug2	oug 1.5
44	10	oug	oug2	3.0	0.505872	oug oug2	oug 3.0
45	11	oug	oug2	4.5	2.92639	oug oug2	oug 4.5
46	12	oug	oug2	6.0	-4.1381	oug oug2	oug 6.0
47	13	oug	oug2	7.5	1.0795	oug oug2	oug 7.5
48	14	oug	oug2	9.0	4.2191	oug oug2	oug 9.0
49	16	oug	oug3	0.0	-2.97003	oug oug3	oug 0.0
50	17	oug	oug3	1.5	14.2536	oug oug3	oug 1.5
51	18	oug	oug3	3.0	1.66583	oug oug3	oug 3.0
52	19	oug	oug3	4.5	13.5437	oug oug3	oug 4.5
53	20	oug	oug3	6.0	-1.19984	oug oug3	oug 6.0
54	21	oug	oug3	7.5	4.24404	oug oug3	oug 7.5
55	22	oug	oug3	9.0	4.01585	oug oug3	oug 9.0
56	24	oug	oug4	0.0	3.12845	oug oug4	oug 0.0
57	25	oug	oug4	1.5	-2.48649	oug oug4	oug 1.5
58	26	oug	oug4	3.0	-3.27477	oug oug4	oug 3.0
59	27	oug	oug4	4.5	0.354267	oug oug4	oug 4.5
60	28	oug	oug4	6.0	5.41523	oug oug4	oug 6.0
61	29	oug	oug4	7.5	14.3464	oug oug4	oug 7.5
62	30	oug	oug4	9.0	0.709643	oug oug4	oug 9.0
63	32	oug	oug5	0.0	10.5804	oug oug5	oug 0.0
64	33	oug	oug5	1.5	6.3102	oug oug5	oug 1.5
65	34	oug	oug5	3.0	-1.27851	oug oug5	oug 3.0
66	35	oug	oug5	4.5	-1.14507	oug oug5	oug 4.5
67	36	oug	oug5	6.0	-0.876189	oug oug5	oug 6.0
68	37	oug	oug5	7.5	2.39587	oug oug5	oug 7.5
69	38	oug	oug5	9.0	-7.80939	oug oug5	oug 9.0
