# Supplementary material for: Twisting of the zebrafish heart tube during cardiac looping is a tbx5-dependent and tissue-intrinsic process
Source: eLife. 2021 Aug 10;10:e61733. doi: 10.7554/eLife.61733 (PMC8354640; doi:10.7554/eLife.61733)
Supplement: Figure 5—source data 1. [file elife-61733-fig5-data1.xlsx]

## Sheet: Figure 5B
		DMSO	SU5402
	1	119.511	122.563
	2	89.872	135.259
	3	105.791	143.481
	4	135.106	119.928
	5	118.743	126.116
	6	118.453	110.346
	7	136.801	115.648
	8	121.265	131.044
	9	118.223	116.699
	10		122.233
	11		114.5
	12		105.115
	13		121.454
	mean	118.196	121.876
	SEM	3.76045	3.21769
