# Supplementary material for: Twisting of the zebrafish heart tube during cardiac looping is a tbx5-dependent and tissue-intrinsic process
Source: eLife. 2021 Aug 10;10:e61733. doi: 10.7554/eLife.61733 (PMC8354640; doi:10.7554/eLife.61733)
Supplement: Figure 6—source data 1. [file elife-61733-fig6-data1.xlsx]

## Sheet: Figure 6B
		wt ventr.	oug ventr.	wt atrium	oug atrium	wt total	oug total
		200	168	117	134	317	302
		186	215	131	137	317	352
		203	199	121	134	324	333
		201	213	133	138	334	351
		216	197	119	123	335	320
	mean	201.2	198.4	124.2	133.2	325.4	331.6
	SEM	4.76865	8.4119	3.2619	2.67208	3.93192	9.50053
