# Supplementary material for: Twisting of the zebrafish heart tube during cardiac looping is a tbx5-dependent and tissue-intrinsic process
Source: eLife. 2021 Aug 10;10:e61733. doi: 10.7554/eLife.61733 (PMC8354640; doi:10.7554/eLife.61733)
Supplement: Figure 7—source data 1. [file elife-61733-fig7-data1.xlsx]

## Sheet: Figure7B
B
wt		hrt1cell1	hrt1cell2	hrt1cell3	hrt2cell1	hrt3cell1	hrt3cell2	hrt4cell1	hrt4cell2	count	mean	SEM
	30	0.551	0.861		0.82	0.862	0.585	0.804	0.753	7	0.748	0.0486699
	31	0.573	0.81		0.6	0.531	0.593	0.806	0.763	7	0.668	0.0453232
	32	0.592	0.51	0.849	0.558	0.66	0.414	0.735	0.929	8	0.655875	0.0614722
	33	0.435	0.58	0.291	0.457	0.578	0.505	0.629	0.698	8	0.521625	0.0451916
	34	0.388	0.379	0.358	0.589	0.403	0.407	0.687	0.648	8	0.482375	0.0477561
	35	0.36	0.338	0.46	0.374	0.447	0.621	0.36	0.369	8	0.416125	0.0330721
	36	0.317	0.466	0.314	0.474	0.385	0.613	0.371	0.434	8	0.42175	0.034827
	37	0.329	0.225	0.324	0.502	0.31	0.48	0.373	0.468	8	0.376375	0.0346497
	38	0.412	0.352	0.337	0.371	0.478	0.475	0.347	0.463	8	0.404375	0.0213775
	39	0.503	0.395	0.374	0.462	0.409	0.478	0.381	0.291	8	0.411625	0.0240831
	40	0.361	0.488	0.397	0.37	0.463	0.439	0.387	0.37	8	0.409375	0.0169189
	41	0.42	0.419	0.355	0.482			0.239	0.298	6	0.368833	0.036518
	42							0.293	0.339	2	0.316	0.023
oug
	hrt1cell1	hrt1cell2	hrt1cell3	hrt2cell1	hrt2cell2	hrt2cell3	hrt3cell1	hrt3cell2	hrt3cell3	count	mean	SEM
30	0.888	0.948	0.631	0.519	0.884	0.846	0.86	0.725	0.595	9	0.766222	0.051007
31	0.716	0.754	0.651	0.819	0.511	0.689	0.788	0.579	0.694	9	0.689	0.0326828
32	0.971	0.638	0.736	0.436	0.584	0.641	0.455	0.457	0.689	9	0.623	0.056648
33	0.711	0.685	0.855	0.501	0.505	0.59	0.73	0.589	0.657	9	0.647	0.037985
34	0.638	0.888	0.866	0.538	0.786	0.849	0.719	0.569	0.484	9	0.704111	0.0509099
35	0.746	0.941	0.646	0.592	0.906	0.708	0.662	0.43	0.542	9	0.685889	0.054619
36	0.859	0.857	0.684	0.51	0.913	0.634	0.721	0.655	0.492	9	0.702778	0.0502316
37	0.725	0.791	0.754	0.502	0.737	0.536	0.839	0.567	0.511	9	0.662444	0.0439899
38	0.674	0.841	0.826	0.673	0.69	0.518	0.754	0.542	0.522	9	0.671111	0.0412376
39	0.746	0.613		0.73	0.732	0.739	0.904	0.458	0.682	8	0.7005	0.045046
40				0.763	0.509	0.667	0.773	0.592	0.583	6	0.647833	0.0431636
41				0.501	0.603	0.576	0.691	0.552	0.902	6	0.6375	0.0588041
42				0.532	0.708	0.663	0.477	0.649	0.812	6	0.640167	0.049346

## Sheet: Figure 7D
		wt	oug
	1	0.267606	0.328841
	2	0.393531	0.52439
	3	0.288809	0.451613
	4	0.29697	0.438395
	mean	0.311729	0.43581
	SEM	0.0279607	0.040358
