# Supplementary material for: Twisting of the zebrafish heart tube during cardiac looping is a tbx5-dependent and tissue-intrinsic process
Source: eLife. 2021 Aug 10;10:e61733. doi: 10.7554/eLife.61733 (PMC8354640; doi:10.7554/eLife.61733)
Supplement: Figure 8—source data 1. [file elife-61733-fig8-data1.xlsx]

## Sheet: Figure 8C
		sib	tbx5a-/-	tbx5a-/-; tbx2b-/-
	1	86.98	153.03	108.05
	2	95.36	145.72	113.32
	3	97.46	137.03	123.08
	4	123.55	120.52	107.23
	5	116.17	111.51	118.59
	6	104.09	146.87	113.16
	7		155.21	128.89
	8		147.45
	9		143.39
	10		141.39
	mean	103.935	140.212	116.046
	SEM	5.58986	4.40894	3.00133
